# Supplementary material for: Employing the generalized Pareto distribution to analyze extreme rainfall events on consecutive rainy days in Thailand's Chi watershed: implications for flood management
Source: Copernicus journal article supplement (doi:10.5194/hess-28-801-2024), 2024-02-20
Supplement: Supplementary file 1 [file hess-28-801-2024-supplement.pdf]

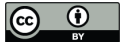

*Supplement of*

## **Employing the generalized Pareto distribution to analyze extreme rainfall events on consecutive rainy days in Thailand's Chi watershed: implications for flood management**

**Tossapol Phoophiwfa et al.**

*Correspondence to:* Piyapatr Busababodhin ([piyapatr.b@msu.ac.th](mailto:piyapatr.b@msu.ac.th))

The copyright of individual parts of the supplement might differ from the article licence.

# 1. Descriptive statistics

Table S 1: Station ID, station name, provincial area, latitude and longitude data for each station.

| Station ID | Station Name              | Province          | Latitude | Longitude |
|------------|---------------------------|-------------------|----------|-----------|
| 48353      | Loei                      | Loei              | 17°45'   | 101°73'   |
| 48350      | Loei Agromet*             | Loei              | 17°40'   | 101°73'   |
| 48354      | Udon Thani                | Udon Thani        | 17°38'   | 102°80'   |
| 48360      | Nong Bua Lamphu           | Nong Bua Lamphu   | 16°24'   | 101°94'   |
| 48381      | Khon Kaen                 | Khon Kaen         | 17°25'   | 102°98'   |
| 48384      | Tha Phra Agromet*         | Khon Kaen         | 16°33'   | 102°82'   |
| 48383      | Mukdahan                  | Mukdahan          | 16°53'   | 104°72'   |
| 48382      | Maha Sarakham             | Maha Sarakham     | 17°07'   | 103°15'   |
| 48390      | Kalasin                   | Kalasin           | 16°24'   | 102°78'   |
| 48403      | Chaiyaphum                | Chaiyaphum        | 15°80'   | 102°03'   |
| 48405      | Roi Et                    | Roi Et            | 16°05'   | 103°68'   |
| 48404      | Roi Et Agromet*           | Roi Et            | 16°07'   | 103°62'   |
| 48408      | Ubon Ratchathani Agromet* | Ubon Ratchathani  | 15°93'   | 105°60'   |
| 48407      | Ubon Ratchathani          | Ubon Ratchathani  | 15°25'   | 104°87'   |
| 48409      | Sisaket                   | Sisaket           | 15°03'   | 104°25'   |
| 48431      | Nakhon Ratchasima         | Nakhon Ratchasima | 15°72'   | 102°67'   |
| 48435      | Pak Chong Agromet*        | Nakhon Ratchasima | 15°27'   | 101°57'   |
| 48434      | Chok Chai                 | Nakhon Ratchasima | 14°85'   | 102°28'   |

Note: \* is sub-station of Meteorological Department for Agricultural.

Table S 2: Preliminary data of rainfall on consecutive rainy days at Loei station (48353).

| Number of<br>CONS-n days | Number of<br>occurrences (times) | Rainfall(mm.) |       |       |
|--------------------------|----------------------------------|---------------|-------|-------|
|                          |                                  | Min           | Avg   | Max   |
| 2                        | 336                              | 0.2           | 18.4  | 115.0 |
| 3                        | 198                              | 0.8           | 34.4  | 147.8 |
| 4                        | 143                              | 2.5           | 42.3  | 202.2 |
| 5                        | 84                               | 5.5           | 51.9  | 232.4 |
| 6                        | 59                               | 11.2          | 69.8  | 304.2 |
| 7                        | 34                               | 5.4           | 84.6  | 211.5 |
| 8                        | 17                               | 14.8          | 90.1  | 258.8 |
| 9                        | 18                               | 18.4          | 112.5 | 239.6 |
| 10                       | 14                               | 32.4          | 123.1 | 275.6 |
| 11                       | 6                                | 55.1          | 202.1 | 317.0 |
| 12                       | 9                                | 54.2          | 129.7 | 233.9 |
| 13                       | 3                                | 109.1         | 167.4 | 200.8 |
| 14                       | 3                                | 157.8         | 173.2 | 193.4 |
| 15                       | 2                                | 155.7         | 166.4 | 177.0 |
| 16                       | 3                                | 138.3         | 183.6 | 210.0 |
| 17                       | 2                                | 146.7         | 258.6 | 370.4 |
| 19                       | 1                                | 192.5         | 192.5 | 192.5 |
| 21                       | 1                                | 368.4         | 368.4 | 368.4 |
| 22                       | 1                                | 607.2         | 607.2 | 607.2 |
| Total                    | 934                              | 0.2           | 161.9 | 607.2 |

Table S 3: Preliminary data of rainfall on consecutive rainy days at Loei Agromet station (48350).

| Number of<br>CONS-n days | Number of<br>occurrences (times) | Rainfall(mm.) |       |       |
|--------------------------|----------------------------------|---------------|-------|-------|
|                          |                                  | Min           | Avg   | Max   |
| 2                        | 364                              | 0.2           | 17.4  | 129.1 |
| 3                        | 199                              | 1.0           | 31.2  | 114.8 |
| 4                        | 125                              | 3.5           | 47.1  | 230.4 |
| 5                        | 76                               | 3.0           | 56.1  | 164.4 |
| 6                        | 68                               | 3.6           | 71.7  | 304.2 |
| 7                        | 31                               | 20.5          | 73.6  | 146.1 |
| 8                        | 29                               | 22.8          | 96.6  | 267.5 |
| 9                        | 12                               | 18.5          | 98.1  | 174.0 |
| 10                       | 16                               | 48.3          | 134.2 | 311.5 |
| 11                       | 4                                | 124.9         | 256.8 | 367.1 |
| 12                       | 3                                | 130.7         | 186.2 | 219.3 |
| 13                       | 4                                | 103.0         | 152.7 | 212.1 |
| 14                       | 2                                | 147.9         | 159.6 | 171.2 |
| 15                       | 3                                | 140.3         | 158.9 | 185.8 |
| 16                       | 4                                | 63.1          | 162.4 | 311.6 |
| 18                       | 1                                | 221.8         | 221.8 | 221.8 |
| 19                       | 1                                | 583.1         | 583.1 | 583.1 |
| 22                       | 1                                | 117.0         | 117.0 | 117.0 |
| Total                    | 943                              | 0.2           | 145.8 | 583.1 |

Table S 4: Preliminary data of rainfall on consecutive rainy days at Udon Thani station (48354).

| Number of<br>CONS-n days | Number of<br>occurrences (times) | Rainfall(mm.) |       |       |
|--------------------------|----------------------------------|---------------|-------|-------|
|                          |                                  | Min           | Avg   | Max   |
| 2                        | 324                              | 0.3           | 18.9  | 178.5 |
| 3                        | 188                              | 0.6           | 33.2  | 155.0 |
| 4                        | 121                              | 2.5           | 52.2  | 154.5 |
| 5                        | 85                               | 9.1           | 59.8  | 185.4 |
| 6                        | 61                               | 19.2          | 79.6  | 245.4 |
| 7                        | 42                               | 4.5           | 92.0  | 429.5 |
| 8                        | 17                               | 46.7          | 119.3 | 226.1 |
| 9                        | 21                               | 30.6          | 149.7 | 309.1 |
| 10                       | 10                               | 36.2          | 126.3 | 194.5 |
| 11                       | 5                                | 73.2          | 92.9  | 111.8 |
| 12                       | 7                                | 112.8         | 150.9 | 219.6 |
| 13                       | 7                                | 80.3          | 187.1 | 245.6 |
| 14                       | 4                                | 127.3         | 238.4 | 344.8 |
| 15                       | 1                                | 133.5         | 133.5 | 133.5 |
| 16                       | 5                                | 85.8          | 298.9 | 451.3 |
| 17                       | 3                                | 137.6         | 171.7 | 194.1 |
| 18                       | 1                                | 299.9         | 299.9 | 299.9 |
| 19                       | 2                                | 133.3         | 210.4 | 287.5 |
| Total                    | 904                              | 0.3           | 139.7 | 451.3 |

Table S 5: Preliminary data of rainfall on consecutive rainy days at Nong Bua Lamphu station (48360).

| Number of<br>CONS-n days | Number of<br>occurrences (times) | Rainfall(mm.) |       |       |
|--------------------------|----------------------------------|---------------|-------|-------|
|                          |                                  | Min           | Avg   | Max   |
| 2                        | 74                               | 0.7           | 20.5  | 84.4  |
| 3                        | 33                               | 2.2           | 42.6  | 95.6  |
| 4                        | 35                               | 4.2           | 53.7  | 230.0 |
| 5                        | 13                               | 5.8           | 51.9  | 137.7 |
| 6                        | 10                               | 52.2          | 91.5  | 152.8 |
| 7                        | 7                                | 28.3          | 108.1 | 178.0 |
| 8                        | 1                                | 156.0         | 156.0 | 156.0 |
| 9                        | 5                                | 81.7          | 202.0 | 473.3 |
| 10                       | 1                                | 37.7          | 37.7  | 37.7  |
| 11                       | 1                                | 84.7          | 84.7  | 84.7  |
| 13                       | 1                                | 134.1         | 134.1 | 134.1 |
| 14                       | 2                                | 78.1          | 125.0 | 171.8 |
| 15                       | 1                                | 143.8         | 143.8 | 143.8 |
| 17                       | 1                                | 174.3         | 174.3 | 174.3 |
| Total                    | 185                              | 0.7           | 101.8 | 473.3 |

Table S 6: Preliminary data of rainfall on consecutive rainy days at Khon Kaen station (48381).

| Number of<br>CONS-n days | Number of<br>occurrences (times) | Rainfall(mm.) |       |       |
|--------------------------|----------------------------------|---------------|-------|-------|
|                          |                                  | Min           | Avg   | Max   |
| 2                        | 347                              | 0.2           | 20.7  | 155.8 |
| 3                        | 184                              | 0.8           | 36.3  | 233.6 |
| 4                        | 142                              | 3.0           | 50.0  | 173.3 |
| 5                        | 75                               | 6.4           | 65.1  | 216.6 |
| 6                        | 43                               | 16.6          | 76.1  | 153.0 |
| 7                        | 22                               | 24.0          | 80.3  | 228.5 |
| 8                        | 21                               | 27.6          | 83.8  | 190.1 |
| 9                        | 14                               | 28.7          | 110.3 | 173.2 |
| 10                       | 6                                | 92.7          | 126.3 | 182.7 |
| 11                       | 1                                | 206.8         | 206.8 | 206.8 |
| 12                       | 4                                | 74.1          | 121.5 | 189.0 |
| 13                       | 4                                | 111.5         | 214.4 | 363.4 |
| 14                       | 2                                | 132.6         | 180.4 | 228.1 |
| 15                       | 3                                | 110.9         | 223.0 | 303.0 |
| Total                    | 868                              | 0.2           | 113.9 | 363.4 |

Table S 7: Preliminary data of rainfall on consecutive rainy days at Tha Phra Agromet station (48384).

| Number of<br>CONS-n days | Number of<br>occurrences (times) | Rainfall(mm.) |       |       |
|--------------------------|----------------------------------|---------------|-------|-------|
|                          |                                  | Min           | Avg   | Max   |
| 2                        | 357                              | 0.4           | 22.7  | 194.0 |
| 3                        | 201                              | 0.8           | 33.9  | 171.1 |
| 4                        | 96                               | 2.4           | 49.4  | 156.9 |
| 5                        | 82                               | 6.6           | 71.1  | 188.8 |
| 6                        | 42                               | 10.3          | 78.4  | 289.8 |
| 7                        | 23                               | 25.6          | 89.9  | 200.2 |
| 8                        | 10                               | 35.1          | 111.7 | 264.7 |
| 9                        | 6                                | 44.8          | 89.1  | 123.7 |
| 10                       | 8                                | 64.3          | 114.9 | 162.6 |
| 11                       | 4                                | 71.3          | 158.7 | 271.2 |
| 12                       | 4                                | 38.7          | 130.4 | 215.5 |
| 13                       | 2                                | 124.0         | 270.1 | 416.2 |
| 15                       | 1                                | 200.9         | 200.9 | 200.9 |
| 16                       | 1                                | 194.8         | 194.8 | 194.8 |
| 18                       | 1                                | 308.9         | 308.9 | 308.9 |
| Total                    | 838                              | 0.4           | 128.3 | 416.2 |

Table S 8: Preliminary data of rainfall on consecutive rainy days at Mukdahan station (48383).

| Number of<br>CONS-n days | Number of<br>occurrences (times) | Rainfall(mm.) |       |       |
|--------------------------|----------------------------------|---------------|-------|-------|
|                          |                                  | Min           | Avg   | Max   |
| 2                        | 340                              | 0.2           | 19.6  | 129.3 |
| 3                        | 186                              | 1.0           | 40.1  | 263.5 |
| 4                        | 104                              | 5.8           | 52.9  | 160.4 |
| 5                        | 77                               | 4.1           | 67.6  | 169.9 |
| 6                        | 45                               | 28.0          | 82.4  | 221.0 |
| 7                        | 34                               | 10.8          | 107.0 | 245.7 |
| 8                        | 24                               | 30.4          | 145.3 | 336.4 |
| 9                        | 18                               | 67.9          | 146.7 | 320.3 |
| 10                       | 10                               | 69.7          | 146.3 | 243.5 |
| 11                       | 10                               | 55.7          | 187.1 | 355.4 |
| 12                       | 8                                | 79.8          | 228.6 | 387.7 |
| 13                       | 2                                | 297.7         | 304.4 | 311.1 |
| 14                       | 6                                | 108.3         | 220.6 | 357.1 |
| 15                       | 1                                | 425.0         | 425.0 | 425.0 |
| 16                       | 3                                | 207.0         | 243.7 | 314.1 |
| 17                       | 1                                | 176.2         | 176.2 | 176.2 |
| 18                       | 1                                | 336.0         | 336.0 | 336.0 |
| 22                       | 1                                | 379.5         | 379.5 | 379.5 |
| 24                       | 1                                | 274.5         | 274.5 | 274.5 |
| 28                       | 1                                | 611.1         | 611.1 | 611.1 |
| Total                    | 873                              | 0.2           | 209.7 | 611.1 |

Table S 9: Preliminary data of rainfall on consecutive rainy days at Maha Sarakham (48382).

| Number of<br>CONS-n days | Number of<br>occurrences (times) | Rainfall(mm.) |       |       |
|--------------------------|----------------------------------|---------------|-------|-------|
|                          |                                  | Min           | Avg   | Max   |
| 2                        | 392                              | 0.3           | 23.5  | 164.8 |
| 3                        | 189                              | 0.6           | 39.7  | 189.1 |
| 4                        | 108                              | 4.7           | 55.7  | 212.1 |
| 5                        | 63                               | 3.6           | 81.0  | 228.0 |
| 6                        | 43                               | 12.0          | 86.0  | 210.4 |
| 7                        | 22                               | 24.3          | 100.5 | 243.6 |
| 8                        | 13                               | 44.9          | 97.5  | 168.0 |
| 9                        | 16                               | 55.5          | 162.4 | 382.2 |
| 10                       | 7                                | 76.7          | 128.2 | 163.1 |
| 11                       | 4                                | 51.0          | 137.6 | 221.5 |
| 12                       | 2                                | 112.8         | 174.0 | 235.2 |
| 17                       | 1                                | 277.3         | 277.3 | 277.3 |
| 20                       | 1                                | 313.5         | 313.5 | 313.5 |
| Total                    | 861                              | 0.3           | 129.0 | 382.2 |

Table S 10: Preliminary data of rainfall on consecutive rainy days at Kalasin (48390).

| Number of<br>CONS-n days | Number of<br>occurrences (times) | Rainfall(mm.) |       |       |
|--------------------------|----------------------------------|---------------|-------|-------|
|                          |                                  | Min           | Avg   | Max   |
| 2                        | 140                              | 0.4           | 22.5  | 171.4 |
| 3                        | 65                               | 2.8           | 32.8  | 151.3 |
| 4                        | 36                               | 6.6           | 53.6  | 141.7 |
| 5                        | 26                               | 9.2           | 69.8  | 228.4 |
| 6                        | 28                               | 11.5          | 105.2 | 303.0 |
| 7                        | 11                               | 39.6          | 83.8  | 124.1 |
| 8                        | 5                                | 59.8          | 113.2 | 215.6 |
| 9                        | 4                                | 104.3         | 145.4 | 227.7 |
| 10                       | 1                                | 185.1         | 185.1 | 185.1 |
| 12                       | 1                                | 174.6         | 174.6 | 174.6 |
| 13                       | 3                                | 130.0         | 163.1 | 207.0 |
| 14                       | 1                                | 199.4         | 199.4 | 199.4 |
| 15                       | 1                                | 291.3         | 291.3 | 291.3 |
| 16                       | 1                                | 286.9         | 286.9 | 286.9 |
| Total                    | 323                              | 0.4           | 137.6 | 303.0 |

Table S 11: Preliminary data of rainfall on consecutive rainy days at Chaiyaphum (48403).

| Number of<br>CONS-n days | Number of<br>occurrences (times) | Rainfall(mm.) |       |       |
|--------------------------|----------------------------------|---------------|-------|-------|
|                          |                                  | Min           | Avg   | Max   |
| 2                        | 321                              | 0.3           | 21.4  | 201.6 |
| 3                        | 206                              | 1.5           | 37.5  | 163.4 |
| 4                        | 114                              | 4.5           | 45.6  | 207.9 |
| 5                        | 60                               | 3.6           | 55.1  | 211.0 |
| 6                        | 59                               | 9.0           | 70.9  | 143.4 |
| 7                        | 20                               | 19.4          | 82.2  | 196.1 |
| 8                        | 16                               | 56.3          | 117.1 | 199.6 |
| 9                        | 10                               | 23.2          | 128.3 | 224.3 |
| 10                       | 4                                | 39.1          | 109.5 | 167.7 |
| 11                       | 3                                | 125.3         | 200.0 | 248.5 |
| 12                       | 3                                | 50.6          | 108.0 | 158.9 |
| 13                       | 1                                | 379.2         | 379.2 | 379.2 |
| Total                    | 817                              | 0.3           | 112.9 | 379.2 |

Table S 12: Preliminary data of rainfall on consecutive rainy days at Roi Et (48405).

| Number of<br>CONS-n days | Number of<br>occurrences (times) | Rainfall(mm.) |       |       |
|--------------------------|----------------------------------|---------------|-------|-------|
|                          |                                  | Min           | Avg   | Max   |
| 2                        | 356                              | 0.2           | 23.5  | 135.1 |
| 3                        | 206                              | 1.5           | 36.6  | 212.8 |
| 4                        | 120                              | 4.0           | 58.2  | 183.3 |
| 5                        | 54                               | 2.2           | 61.5  | 182.1 |
| 6                        | 52                               | 23.4          | 84.7  | 188.8 |
| 7                        | 34                               | 21.4          | 97.6  | 272.6 |
| 8                        | 15                               | 19.5          | 153.8 | 297.5 |
| 9                        | 13                               | 14.8          | 141.8 | 294.2 |
| 10                       | 4                                | 56.3          | 94.3  | 131.7 |
| 11                       | 8                                | 104.4         | 187.1 | 335.4 |
| 12                       | 5                                | 112.6         | 185.2 | 295.0 |
| 13                       | 4                                | 90.7          | 179.9 | 242.1 |
| 14                       | 1                                | 180.6         | 180.6 | 180.6 |
| 15                       | 2                                | 171.4         | 182.0 | 192.5 |
| 17                       | 1                                | 302.8         | 302.8 | 302.8 |
| 19                       | 1                                | 133.1         | 133.1 | 133.1 |
| Total                    | 876                              | 0.2           | 131.4 | 335.4 |

Table S 13: Preliminary data of rainfall on consecutive rainy days at Roi Et Agromet (48404).

| Number of<br>CONS-n days | Number of<br>occurrences (times) | Rainfall(mm.) |       |       |
|--------------------------|----------------------------------|---------------|-------|-------|
|                          |                                  | Min           | Avg   | Max   |
| 2                        | 368                              | 0.4           | 21.6  | 141.8 |
| 3                        | 188                              | 1.2           | 43.8  | 182.1 |
| 4                        | 107                              | 4.4           | 65.7  | 330.0 |
| 5                        | 66                               | 7.9           | 69.7  | 228.3 |
| 6                        | 38                               | 15.4          | 74.1  | 177.9 |
| 7                        | 22                               | 36.4          | 98.8  | 195.9 |
| 8                        | 13                               | 16.6          | 112.4 | 197.3 |
| 9                        | 14                               | 53.4          | 133.2 | 240.4 |
| 10                       | 9                                | 79.8          | 161.3 | 288.4 |
| 11                       | 9                                | 55.6          | 199.2 | 343.3 |
| 12                       | 2                                | 137.2         | 200.7 | 264.2 |
| 14                       | 3                                | 159.0         | 218.0 | 295.7 |
| 16                       | 1                                | 199.8         | 199.8 | 199.8 |
| 17                       | 2                                | 222.0         | 239.4 | 256.8 |
| Total                    | 842                              | 0.4           | 131.3 | 343.3 |

Table S 14: Preliminary data of rainfall on consecutive rainy days at Ubon Ratchathani Agromet (48408).

| Number of<br>CONS-n days | Number of<br>occurrences (times) | Rainfall(mm.) |       |       |
|--------------------------|----------------------------------|---------------|-------|-------|
|                          |                                  | Min           | Avg   | Max   |
| 2                        | 305                              | 0.4           | 22.5  | 123.0 |
| 3                        | 190                              | 0.4           | 33.2  | 192.6 |
| 4                        | 92                               | 1.9           | 62.7  | 360.1 |
| 5                        | 82                               | 1.8           | 70.1  | 195.2 |
| 6                        | 51                               | 12.6          | 93.2  | 270.5 |
| 7                        | 32                               | 22.5          | 95.0  | 186.4 |
| 8                        | 24                               | 18.6          | 127.2 | 278.7 |
| 9                        | 23                               | 46.0          | 140.3 | 322.1 |
| 10                       | 17                               | 61.0          | 150.7 | 255.6 |
| 11                       | 9                                | 80.2          | 148.5 | 233.6 |
| 12                       | 9                                | 129.7         | 224.3 | 360.5 |
| 13                       | 2                                | 304.6         | 306.1 | 307.6 |
| 14                       | 5                                | 105.7         | 199.9 | 250.5 |
| 15                       | 5                                | 126.8         | 232.6 | 357.1 |
| 16                       | 3                                | 152.9         | 356.4 | 499.0 |
| 17                       | 1                                | 255.7         | 255.7 | 255.7 |
| 18                       | 2                                | 190.0         | 217.4 | 244.8 |
| 21                       | 1                                | 319.9         | 319.9 | 319.9 |
| 28                       | 3                                | 378.9         | 452.2 | 488.9 |
| Total                    | 856                              | 0.4           | 184.6 | 499.0 |



Table S 15: Preliminary data of rainfall on consecutive rainy days at Ubon Ratchathani station (48407).

| Number of<br>CONS-n days | Number of<br>occurrences (times) | Rainfall(mm.) |       |       |
|--------------------------|----------------------------------|---------------|-------|-------|
|                          |                                  | Min           | Avg   | Max   |
| 2                        | 321                              | 0.3           | 22.6  | 129.4 |
| 3                        | 187                              | 1.7           | 42.1  | 206.3 |
| 4                        | 104                              | 5.0           | 52.6  | 160.7 |
| 5                        | 66                               | 8.0           | 69.9  | 227.6 |
| 6                        | 50                               | 10.3          | 97.1  | 234.4 |
| 7                        | 32                               | 28.8          | 115.2 | 250.5 |
| 8                        | 31                               | 30.7          | 149.9 | 423.5 |
| 9                        | 22                               | 20.7          | 154.3 | 393.7 |
| 10                       | 7                                | 76.8          | 130.9 | 161.4 |
| 11                       | 7                                | 134.9         | 196.6 | 291.6 |
| 12                       | 9                                | 112.1         | 186.2 | 263.7 |
| 13                       | 2                                | 170.1         | 185.1 | 200.1 |
| 14                       | 3                                | 104.6         | 191.3 | 287.6 |
| 15                       | 5                                | 201.3         | 259.3 | 382.2 |
| 16                       | 4                                | 185.8         | 284.0 | 406.4 |
| 17                       | 2                                | 254.8         | 332.7 | 410.6 |
| 18                       | 3                                | 253.0         | 281.6 | 296.7 |
| Total                    | 855                              | 0.3           | 161.8 | 423.5 |

Table S 16: Preliminary data of rainfall on consecutive rainy days at Sisaket (48409).

| Number of<br>CONS-n days | Number of<br>occurrences (times) | Rainfall(mm.) |       |       |
|--------------------------|----------------------------------|---------------|-------|-------|
|                          |                                  | Min           | Avg   | Max   |
| 2                        | 331                              | 0.2           | 23.5  | 143.0 |
| 3                        | 163                              | 1.1           | 38.6  | 197.8 |
| 4                        | 98                               | 7.5           | 55.2  | 174.3 |
| 5                        | 76                               | 5.0           | 72.7  | 364.2 |
| 6                        | 47                               | 11.3          | 104.0 | 251.1 |
| 7                        | 43                               | 15.8          | 116.3 | 428.1 |
| 8                        | 21                               | 47.3          | 139.9 | 270.6 |
| 9                        | 13                               | 67.1          | 134.0 | 271.4 |
| 10                       | 11                               | 41.6          | 180.1 | 391.0 |
| 11                       | 5                                | 124.1         | 162.0 | 198.1 |
| 12                       | 2                                | 145.8         | 181.9 | 218.0 |
| 13                       | 3                                | 126.2         | 139.5 | 166.1 |
| 14                       | 2                                | 75.3          | 261.1 | 446.8 |
| 15                       | 2                                | 140.6         | 204.0 | 267.3 |
| 16                       | 1                                | 218.1         | 218.1 | 218.1 |
| 17                       | 1                                | 189.3         | 189.3 | 189.3 |
| 18                       | 1                                | 206.2         | 206.2 | 206.2 |
| Total                    | 820                              | 0.2           | 142.7 | 446.8 |

Table S 17: Preliminary data of rainfall on consecutive rainy days at Nakhon Ratchasima (48431).

| Number of<br>CONS-n days | Number of<br>occurrences (times) | Rainfall(mm.) |       |       |
|--------------------------|----------------------------------|---------------|-------|-------|
|                          |                                  | Min           | Avg   | Max   |
| 2                        | 394                              | 0.2           | 18.1  | 132.1 |
| 3                        | 207                              | 0.5           | 33.0  | 173.7 |
| 4                        | 111                              | 3.3           | 47.7  | 210.0 |
| 5                        | 71                               | 3.3           | 60.0  | 238.9 |
| 6                        | 34                               | 15.7          | 79.4  | 181.6 |
| 7                        | 25                               | 16.2          | 69.7  | 174.9 |
| 8                        | 12                               | 24.8          | 88.6  | 127.7 |
| 9                        | 11                               | 66.0          | 131.8 | 253.0 |
| 10                       | 4                                | 86.0          | 113.7 | 124.4 |
| 11                       | 1                                | 222.4         | 222.4 | 222.4 |
| 12                       | 1                                | 252.3         | 252.3 | 252.3 |
| 13                       | 4                                | 92.7          | 210.7 | 446.2 |
| 14                       | 1                                | 115.5         | 115.5 | 115.5 |
| 21                       | 1                                | 234.4         | 234.4 | 234.4 |
| Total                    | 877                              | 0.2           | 119.8 | 446.2 |

Table S 18: Preliminary data of rainfall on consecutive rainy days at Pak Chong Agromet (48435).

| Number of<br>CONS-n days | Number of<br>occurrences (times) | Rainfall(mm.) |       |       |
|--------------------------|----------------------------------|---------------|-------|-------|
|                          |                                  | Min           | Avg   | Max   |
| 2                        | 379                              | 0.2           | 15.6  | 99.6  |
| 3                        | 233                              | 0.6           | 28.5  | 114.7 |
| 4                        | 134                              | 2.1           | 40.3  | 167.9 |
| 5                        | 75                               | 5.4           | 60.0  | 209.2 |
| 6                        | 44                               | 17.1          | 63.0  | 215.2 |
| 7                        | 31                               | 16.9          | 75.7  | 163.7 |
| 8                        | 23                               | 24.9          | 62.4  | 132.6 |
| 9                        | 11                               | 37.6          | 95.7  | 255.3 |
| 10                       | 10                               | 26.7          | 111.3 | 208.6 |
| 11                       | 7                                | 71.9          | 148.6 | 244.7 |
| 12                       | 2                                | 132.2         | 134.4 | 136.6 |
| 13                       | 4                                | 134.1         | 178.4 | 228.3 |
| 14                       | 2                                | 166.0         | 211.7 | 257.4 |
| 15                       | 1                                | 367.4         | 367.4 | 367.4 |
| 16                       | 1                                | 142.9         | 142.9 | 142.9 |
| 23                       | 1                                | 247.5         | 247.5 | 247.5 |
| Total                    | 958                              | 0.2           | 124.0 | 367.4 |

Table S 19: Preliminary data of rainfall on consecutive rainy days at Chok Chai (48434).

| Number of<br>CONS-n days | Number of<br>occurrences (times) | Rainfall(mm.) |       |       |
|--------------------------|----------------------------------|---------------|-------|-------|
|                          |                                  | Min           | Avg   | Max   |
| 2                        | 395                              | 0.2           | 16.6  | 103.3 |
| 3                        | 189                              | 0.6           | 29.6  | 155.7 |
| 4                        | 111                              | 2.3           | 42.1  | 179.2 |
| 5                        | 81                               | 7.3           | 50.8  | 180.2 |
| 6                        | 39                               | 6.7           | 66.7  | 149.6 |
| 7                        | 30                               | 21.6          | 82.7  | 179.8 |
| 8                        | 8                                | 33.0          | 67.4  | 117.6 |
| 9                        | 10                               | 56.9          | 121.3 | 195.3 |
| 10                       | 7                                | 65.2          | 152.5 | 291.6 |
| 11                       | 3                                | 55.5          | 85.1  | 121.1 |
| 12                       | 2                                | 101.2         | 119.8 | 138.4 |
| 13                       | 2                                | 84.8          | 115.3 | 145.8 |
| 14                       | 1                                | 106.3         | 106.3 | 106.3 |
| 16                       | 2                                | 215.1         | 240.1 | 265.1 |
| 17                       | 1                                | 173.3         | 173.3 | 173.3 |
| 18                       | 1                                | 301.4         | 301.4 | 301.4 |
| Total                    | 882                              | 0.2           | 110.7 | 301.4 |

Table S 20: Descriptive statistics of maximum cumulative rainfall of CONS-2 days for some stations.

| Station | Min | Max   | Avg   | Median | Skewness | Kurtosis |
|---------|-----|-------|-------|--------|----------|----------|
| 48353   | 0.1 | 154.9 | 13.23 | 6.20   | 2.72     | 10.29    |
| 48350   | 0.1 | 174.8 | 13.34 | 6.60   | 2.73     | 10.45    |
| 48354   | 0.1 | 184.7 | 14.35 | 6.00   | 2.66     | 9.78     |
| 48360   | 0.1 | 335.1 | 19.12 | 9.50   | 3.20     | 17.85    |
| 48381   | 0.1 | 239.1 | 20.29 | 10.40  | 2.50     | 8.94     |
| 48384   | 0.1 | 302.8 | 19.38 | 10.00  | 2.78     | 12.82    |
| 48383   | 0.1 | 279.5 | 17.92 | 8.80   | 2.84     | 13.45    |
| 48382   | 0.1 | 245.1 | 17.83 | 8.80   | 2.70     | 11.02    |
| 48390   | 0.1 | 196.5 | 15.61 | 7.10   | 2.42     | 8.57     |
| 48403   | 0.1 | 251.7 | 17.79 | 8.40   | 3.28     | 16.65    |
| 48405   | 0.1 | 236.7 | 17.59 | 8.50   | 2.75     | 11.47    |
| 48404   | 0.1 | 316.9 | 19.03 | 9.10   | 2.72     | 12.25    |
| 48408   | 0.1 | 283.5 | 15.95 | 7.70   | 2.93     | 14.14    |
| 48407   | 0.1 | 269.4 | 15.72 | 7.30   | 2.61     | 11.74    |
| 48409   | 0.1 | 310.4 | 17.65 | 8.60   | 3.71     | 25.66    |
| 48431   | 0.1 | 309.3 | 17.32 | 8.45   | 2.96     | 16.44    |
| 48435   | 0.1 | 253.6 | 15.21 | 7.40   | 2.92     | 14.30    |
| 48434   | 0.1 | 253.1 | 15.35 | 7.40   | 2.81     | 12.30    |

Table S 21: Descriptive statistics of maximum cumulative rainfall of CONS-3 days for some stations.

| Station | Min | Max   | Avg   | Median | Skewness | Kurtosis |
|---------|-----|-------|-------|--------|----------|----------|
| 48353   | 0.1 | 154.9 | 13.23 | 6.20   | 2.72     | 10.29    |
| 48350   | 0.1 | 174.8 | 13.34 | 6.60   | 2.73     | 10.45    |
| 48354   | 0.1 | 184.7 | 14.35 | 6.00   | 2.66     | 9.78     |
| 48360   | 0.1 | 335.1 | 19.12 | 9.50   | 3.20     | 17.85    |
| 48381   | 0.1 | 239.1 | 20.29 | 10.40  | 2.50     | 8.94     |
| 48384   | 0.1 | 302.8 | 19.38 | 10.00  | 2.78     | 12.82    |
| 48383   | 0.1 | 279.5 | 17.92 | 8.80   | 2.84     | 13.45    |
| 48382   | 0.1 | 245.1 | 17.83 | 8.80   | 2.70     | 11.02    |
| 48390   | 0.1 | 196.5 | 15.61 | 7.10   | 2.42     | 8.57     |
| 48403   | 0.1 | 251.7 | 17.79 | 8.40   | 3.28     | 16.65    |
| 48405   | 0.1 | 236.7 | 17.59 | 8.50   | 2.75     | 11.47    |
| 48404   | 0.1 | 316.9 | 19.03 | 9.10   | 2.72     | 12.25    |
| 48408   | 0.1 | 283.5 | 15.95 | 7.70   | 2.93     | 14.14    |
| 48407   | 0.1 | 269.4 | 15.72 | 7.30   | 2.61     | 11.74    |
| 48409   | 0.1 | 310.4 | 17.65 | 8.60   | 3.71     | 25.66    |
| 48431   | 0.1 | 309.3 | 17.32 | 8.45   | 2.96     | 16.44    |
| 48435   | 0.1 | 253.6 | 15.21 | 7.40   | 2.92     | 14.30    |
| 48434   | 0.1 | 253.1 | 15.35 | 7.40   | 2.81     | 12.30    |

Table S 22: Descriptive statistics of maximum cumulative rainfall of CONS-4 days for some stations.

| Station | Min | Max   | Avg   | Median | Skewness | Kurtosis |
|---------|-----|-------|-------|--------|----------|----------|
| 48353   | 0.1 | 179.2 | 20.00 | 10.90  | 2.20     | 6.13     |
| 48350   | 0.1 | 222.8 | 20.40 | 11.60  | 2.52     | 9.26     |
| 48354   | 0.1 | 247.3 | 21.32 | 11.00  | 2.50     | 8.95     |
| 48360   | 0.1 | 361.8 | 28.97 | 17.00  | 2.65     | 11.49    |
| 48381   | 0.1 | 295.7 | 31.41 | 18.50  | 2.04     | 5.63     |
| 48384   | 0.1 | 360.1 | 30.57 | 18.40  | 2.24     | 7.66     |
| 48383   | 0.1 | 330.0 | 26.82 | 15.20  | 2.37     | 9.14     |
| 48382   | 0.1 | 264.9 | 26.98 | 15.40  | 2.23     | 7.28     |
| 48390   | 0.1 | 211.9 | 23.26 | 12.60  | 2.10     | 6.07     |
| 48403   | 0.1 | 296.9 | 27.19 | 14.60  | 2.71     | 11.20    |
| 48405   | 0.1 | 310.7 | 26.35 | 14.95  | 2.37     | 8.83     |
| 48404   | 0.1 | 330.1 | 29.58 | 16.80  | 2.24     | 7.41     |
| 48408   | 0.1 | 296.4 | 24.03 | 14.05  | 2.57     | 10.76    |
| 48407   | 0.1 | 273.6 | 24.23 | 14.10  | 2.26     | 8.38     |
| 48409   | 0.2 | 378.4 | 27.60 | 15.40  | 3.30     | 21.22    |
| 48431   | 0.1 | 340.3 | 27.17 | 16.50  | 2.40     | 10.00    |
| 48435   | 0.1 | 284.0 | 23.57 | 13.70  | 2.61     | 11.25    |
| 48434   | 0.1 | 282.6 | 23.87 | 13.50  | 2.43     | 9.57     |

Table S 23: Descriptive statistics of maximum cumulative rainfall of CONS-5 days for some stations.

| Station | Min  | Max    | Avg   | Median | Skewness | Kurtosis |
|---------|------|--------|-------|--------|----------|----------|
| 48353   | 7.30 | 180.20 | 50.44 | 39.35  | 1.31     | 1.49     |
| 48350   | 5.40 | 209.20 | 61.08 | 43.15  | 1.36     | 1.36     |
| 48354   | 3.30 | 238.90 | 58.50 | 49.00  | 1.91     | 5.55     |
| 48360   | 5.00 | 364.20 | 69.94 | 56.95  | 2.64     | 9.22     |
| 48381   | 8.00 | 227.60 | 69.43 | 70.00  | 1.06     | 1.98     |
| 48384   | 1.80 | 195.20 | 69.28 | 66.50  | 0.56     | -0.21    |
| 48383   | 7.90 | 228.30 | 68.88 | 60.00  | 1.37     | 2.10     |
| 48382   | 2.20 | 182.10 | 59.11 | 58.95  | 0.66     | 0.59     |
| 48390   | 3.60 | 211.00 | 53.98 | 35.70  | 1.43     | 2.40     |
| 48403   | 9.20 | 228.40 | 70.44 | 52.10  | 1.30     | 1.02     |
| 48405   | 3.60 | 228.00 | 75.96 | 65.00  | 1.06     | 1.06     |
| 48404   | 4.10 | 169.90 | 66.92 | 63.15  | 0.52     | -0.49    |
| 48408   | 6.60 | 188.80 | 70.49 | 62.15  | 1.17     | 0.87     |
| 48407   | 6.40 | 216.60 | 67.20 | 58.75  | 1.37     | 2.31     |
| 48409   | 5.80 | 137.70 | 51.28 | 44.50  | 0.97     | 0.27     |
| 48431   | 9.10 | 185.40 | 59.54 | 52.85  | 0.78     | 0.31     |
| 48435   | 3.00 | 164.40 | 55.90 | 44.10  | 1.08     | 0.64     |
| 48434   | 5.50 | 232.40 | 51.85 | 45.15  | 2.03     | 6.63     |

Table S 24: Descriptive statistics of maximum cumulative rainfall of CONS-6 days for some stations.

| Station | Min   | Max    | Avg    | Median | Skewness | Kurtosis |
|---------|-------|--------|--------|--------|----------|----------|
| 48353   | 6.70  | 149.60 | 61.82  | 50.50  | 0.63     | -0.74    |
| 48350   | 17.10 | 215.20 | 58.97  | 43.50  | 1.52     | 3.25     |
| 48354   | 15.70 | 181.60 | 78.87  | 59.80  | 0.96     | -0.39    |
| 48360   | 11.30 | 251.10 | 99.31  | 84.90  | 0.74     | -0.15    |
| 48381   | 10.30 | 234.40 | 94.36  | 74.80  | 0.84     | -0.28    |
| 48384   | 12.60 | 270.50 | 88.24  | 75.70  | 1.13     | 1.43     |
| 48383   | 15.40 | 177.90 | 76.10  | 65.40  | 0.55     | -0.43    |
| 48382   | 23.40 | 188.80 | 85.29  | 70.70  | 0.80     | -0.27    |
| 48390   | 9.00  | 143.4  | 70.90  | 71.40  | 0.01     | -0.76    |
| 48403   | 11.5  | 303.0  | 107.90 | 85.30  | 1.02     | -0.11    |
| 48405   | 12.00 | 210.40 | 82.85  | 70.60  | 0.91     | 0.35     |
| 48404   | 28.00 | 221.00 | 84.11  | 70.60  | 1.16     | 0.98     |
| 48408   | 10.30 | 289.80 | 78.60  | 57.10  | 1.82     | 3.33     |
| 48407   | 16.60 | 153.00 | 77.16  | 75.10  | 0.25     | -0.99    |
| 48409   | 52.20 | 152.80 | 91.88  | 96.80  | 0.34     | -1.19    |
| 48431   | 19.20 | 245.40 | 79.24  | 71.10  | 1.41     | 2.38     |
| 48435   | 3.60  | 154.20 | 65.74  | 61.40  | 0.40     | -0.37    |
| 48434   | 11.20 | 304.20 | 69.82  | 55.80  | 1.69     | 4.36     |

Table S 25: Descriptive statistics of maximum cumulative rainfall of CONS-7 days for some stations.

| Station | Min | Max   | Avg   | Median | Skewness | Kurtosis |
|---------|-----|-------|-------|--------|----------|----------|
| 48353   | 0.1 | 232.8 | 29.32 | 18.20  | 1.85     | 4.19     |
| 48350   | 0.1 | 314.1 | 30.55 | 20.00  | 2.05     | 6.10     |
| 48354   | 0.1 | 313.9 | 31.21 | 18.80  | 2.23     | 6.93     |
| 48360   | 0.1 | 428.1 | 43.70 | 29.75  | 2.13     | 7.05     |
| 48381   | 0.1 | 379.3 | 47.74 | 31.80  | 1.70     | 3.75     |
| 48384   | 0.1 | 365.3 | 46.77 | 31.10  | 1.78     | 4.38     |
| 48383   | 0.1 | 361.2 | 39.72 | 26.20  | 1.92     | 5.65     |
| 48382   | 0.1 | 300.4 | 40.49 | 27.50  | 1.76     | 4.17     |
| 48390   | 0.1 | 257.1 | 33.76 | 20.90  | 1.77     | 3.82     |
| 48403   | 0.1 | 337   | 40.48 | 24.60  | 2.05     | 6.07     |
| 48405   | 0.1 | 375.2 | 38.60 | 25.50  | 1.92     | 5.86     |
| 48404   | 0.1 | 392.8 | 44.80 | 29.10  | 1.88     | 4.85     |
| 48408   | 0.1 | 291.7 | 34.79 | 23.00  | 1.91     | 5.22     |
| 48407   | 0.1 | 279.1 | 35.88 | 24.40  | 1.64     | 3.69     |
| 48409   | 0.2 | 456.1 | 41.84 | 26.10  | 2.77     | 15.39    |
| 48431   | 0.1 | 429.5 | 41.14 | 28.50  | 2.00     | 6.70     |
| 48435   | 0.1 | 420.7 | 35.43 | 23.20  | 2.29     | 9.10     |
| 48434   | 0.1 | 434.2 | 36.11 | 23.40  | 2.10     | 7.74     |

## 2. Box plot and density plot

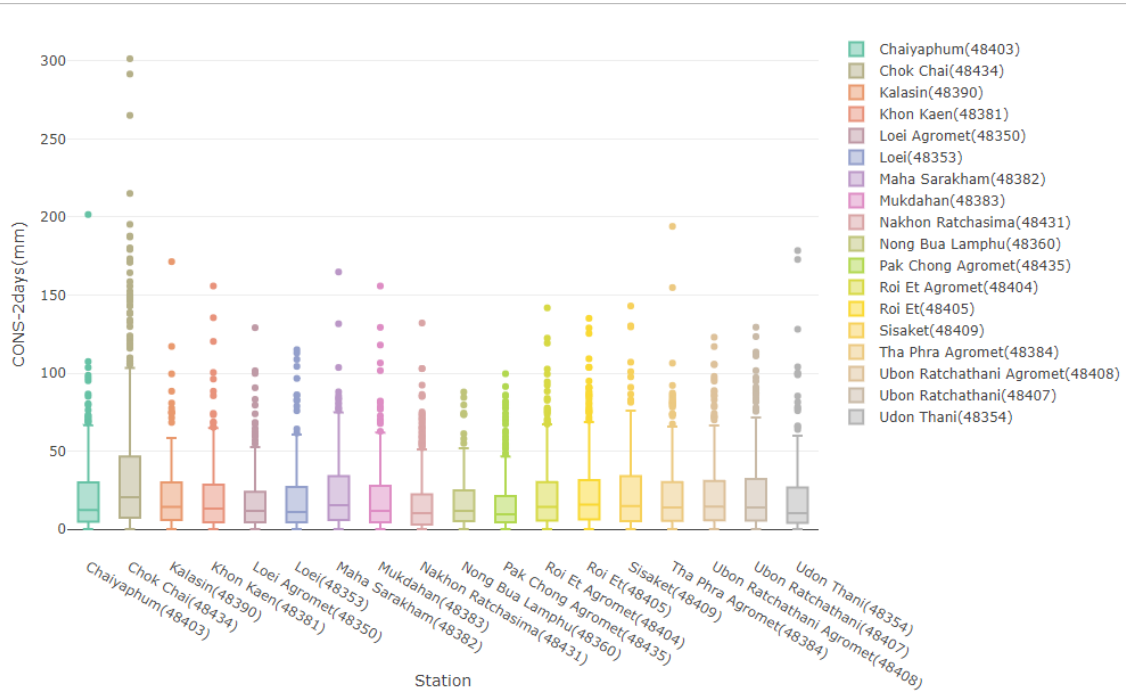

Figure S 1: Box plot of cumulative rainfall on CONS-2 days(mm.) for all stations.

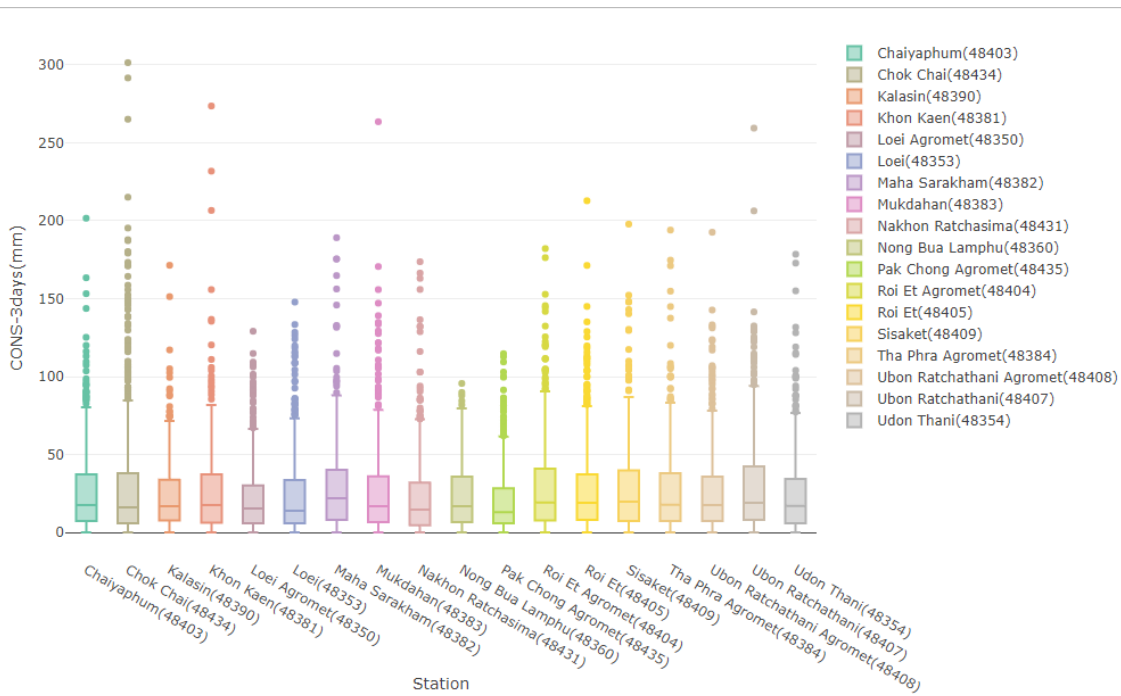

Figure S 2: Box plot of cumulative rainfall on CONS-3 days(mm.) for all stations.

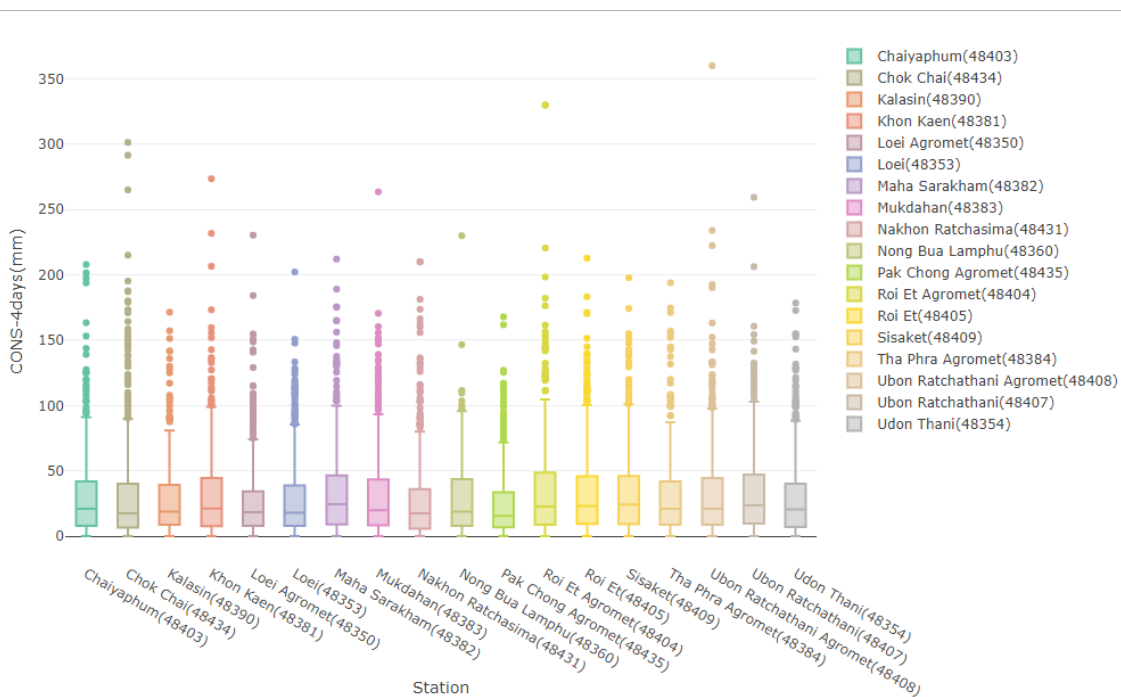

Figure S 3: Box plot of cumulative rainfall on CONS-4 days(mm.) for all stations.

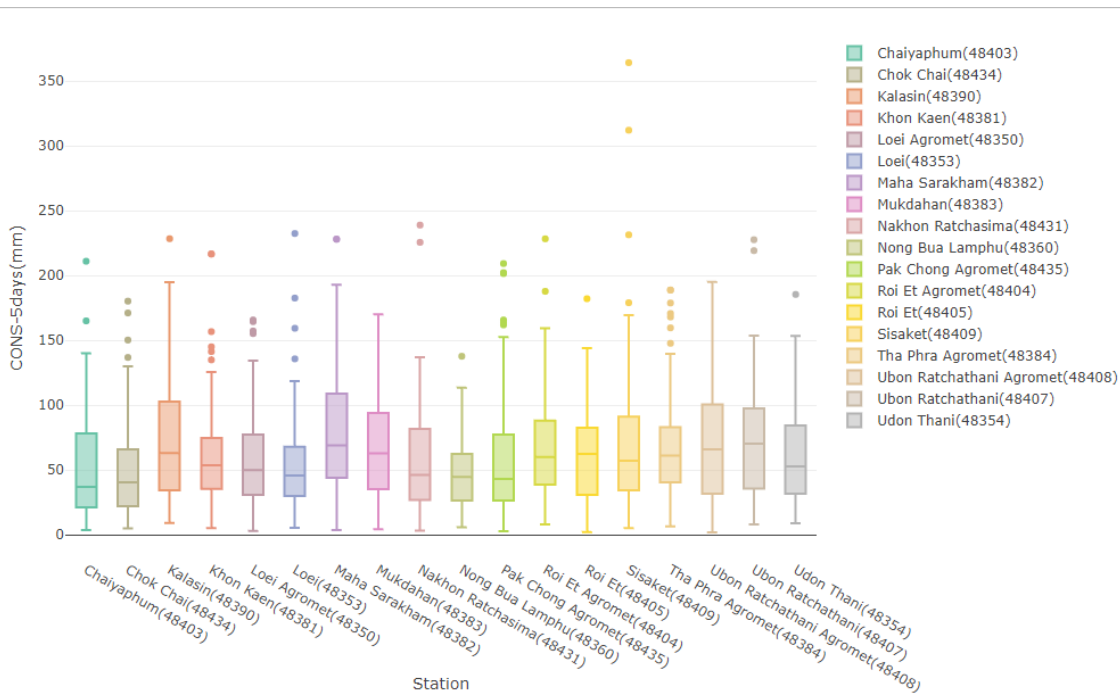

Figure S 4: Box plot of cumulative rainfall on CONS-5 days(mm.) for all stations.

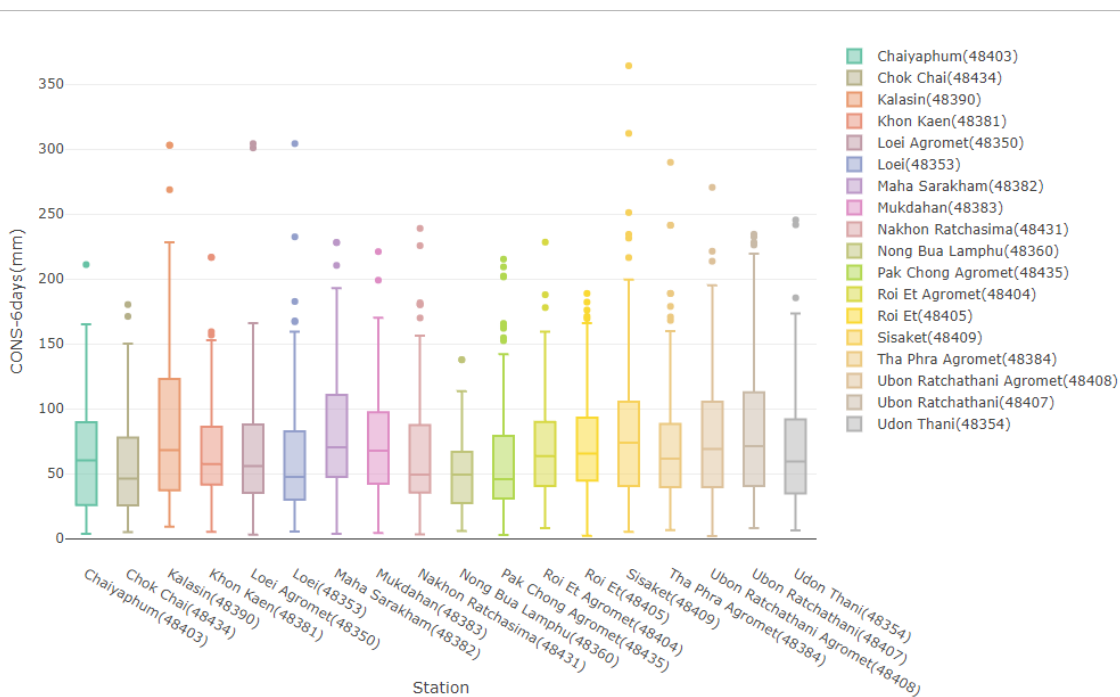

Figure S 5: Box plot of cumulative rainfall on CONS-6 days(mm.) for all stations.



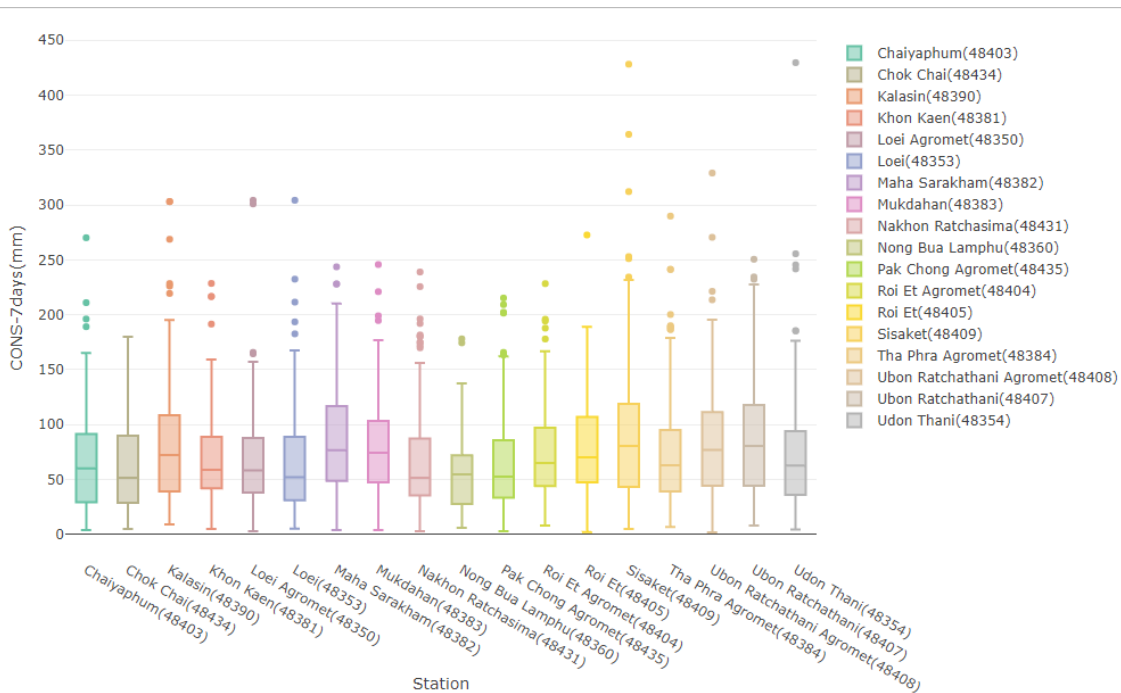

Figure S 6: Box plot of cumulative rainfall on CONS-7 days(mm.) for all stations.

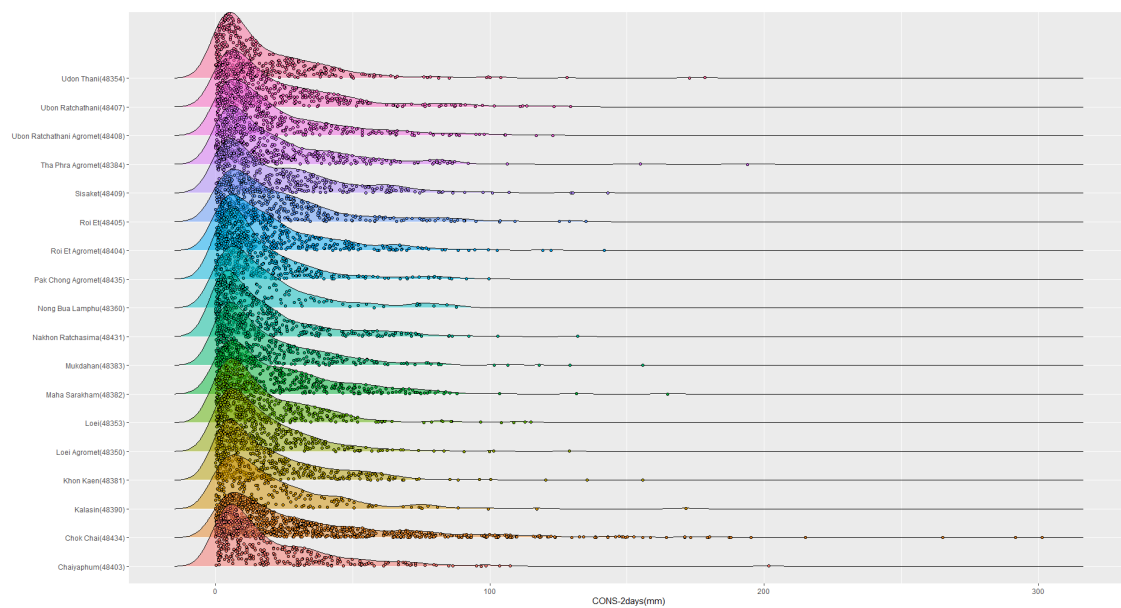

Figure S 7: Density plot of cumulative rainfall on CONS-2 days(mm.) for all stations.

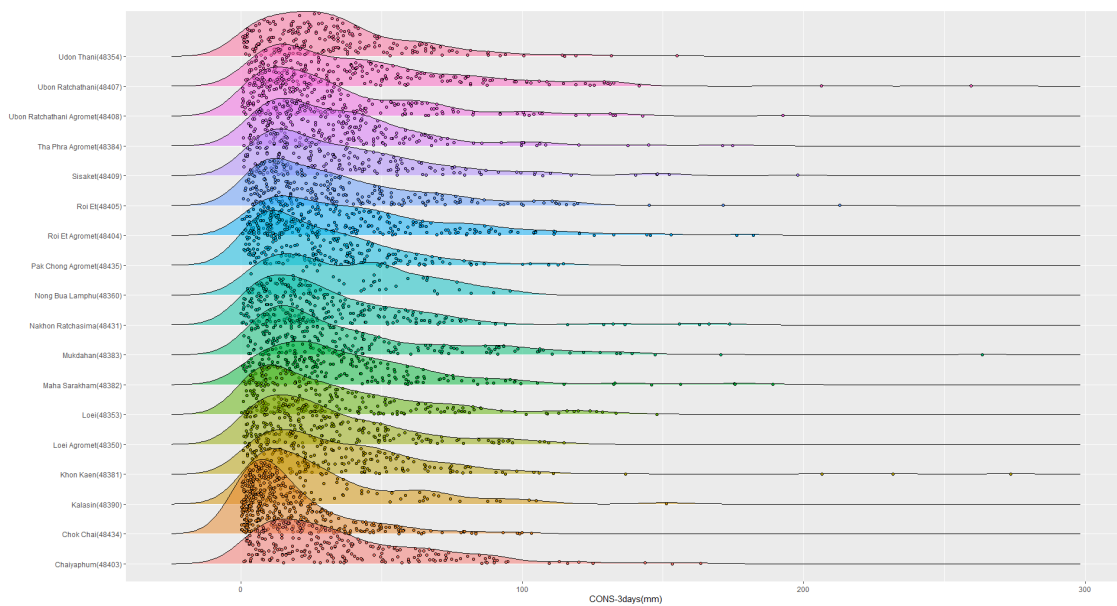

Figure S 8: Density plot of cumulative rainfall on CONS-3 days(mm.) for all stations.

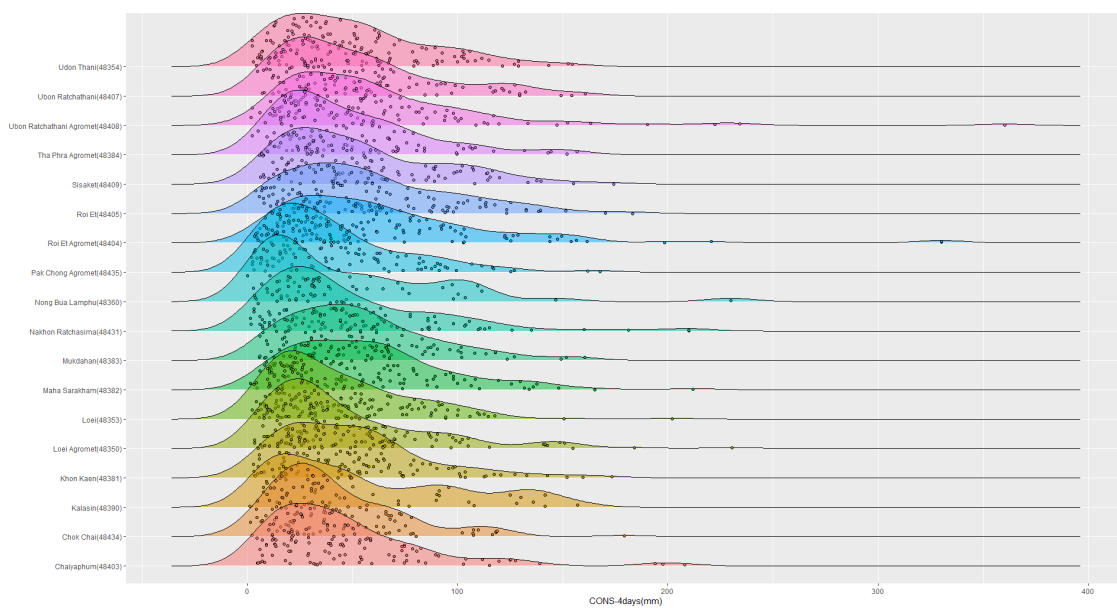

Figure S 9: Density plot of cumulative rainfall on CONS-4 days(mm.) for all stations.

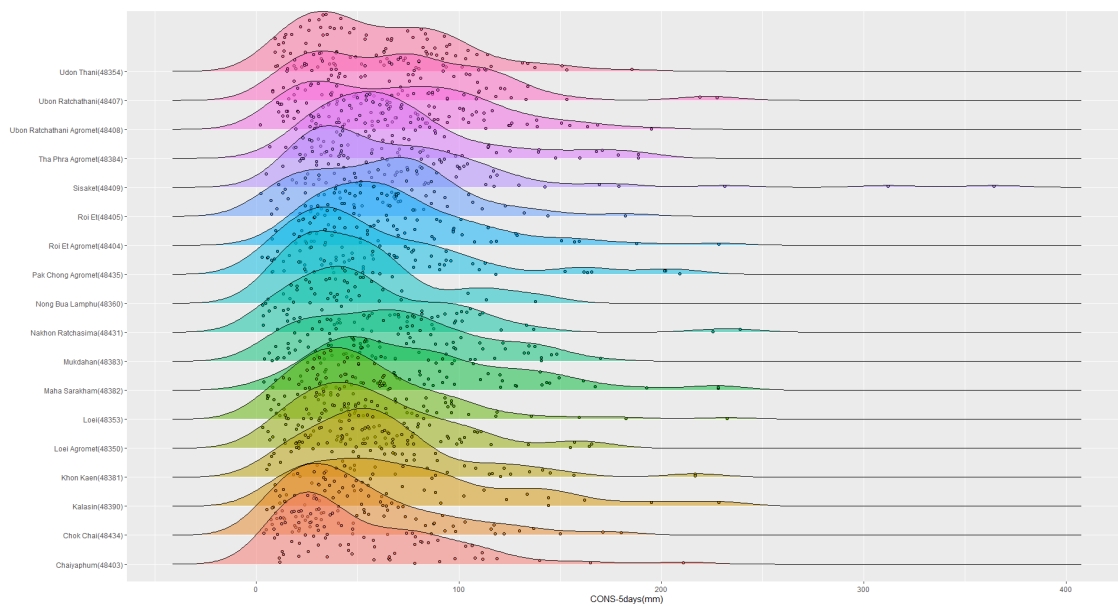

Figure S 10: Density plot of cumulative rainfall on CONS-5 days(mm.) for all stations.

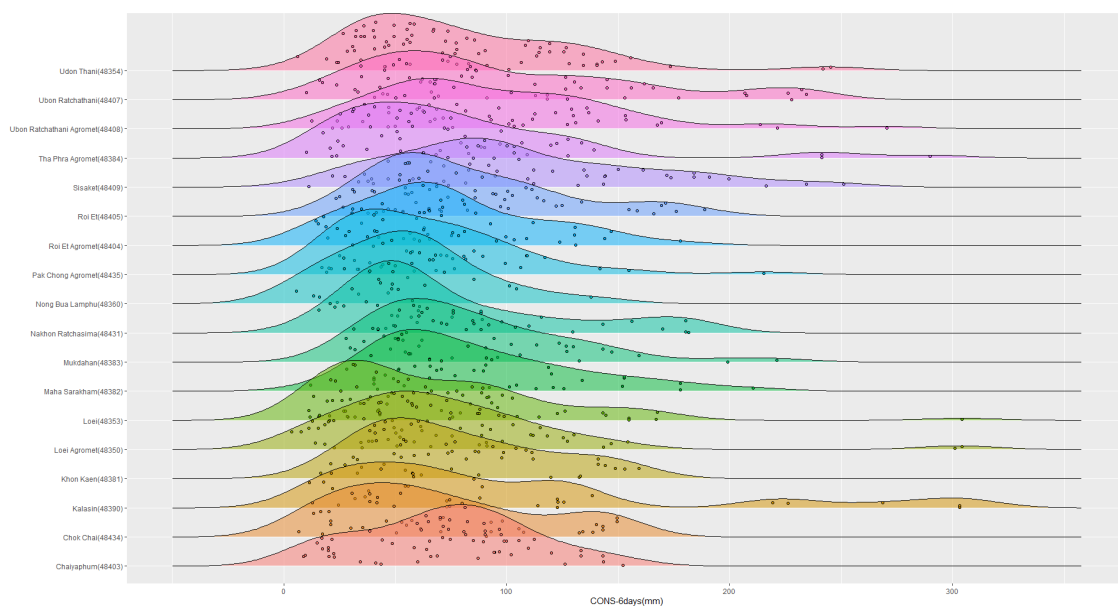

Figure S 11: Density plot of cumulative rainfall on CONS-6 days(mm.) for all stations.

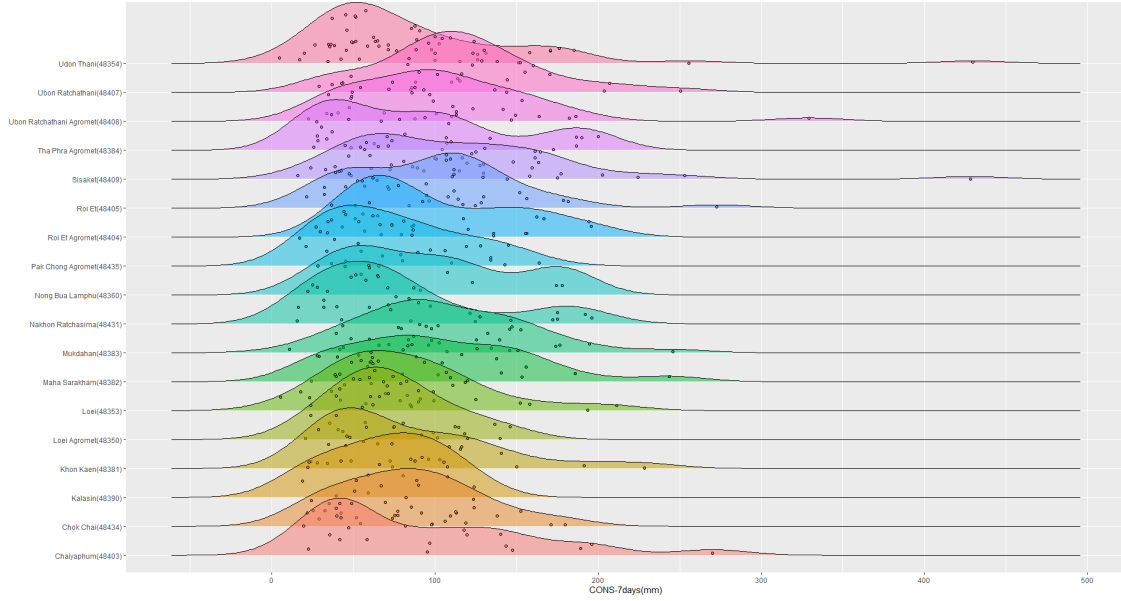

Figure S 12: Density plot of cumulative rainfall on CONS-7 days(mm.) for all stations.

### 3. Parameter estimation

Table S 26: Parameter estimates and standard error (SE) with thresholds ( $u$ ), number of exceedances  $n_{y_i > u}$ , and goodness-of-fit test results(p-values) for the maximum cumulative rainfall of of CONS-2 days for all stations.

| Station ID | Model | $u$             | $n_{y_i > u}$ | $\sigma(SE)$                                          | $\xi(SE)$   | KS(p-value) | AIC    |
|------------|-------|-----------------|---------------|-------------------------------------------------------|-------------|-------------|--------|
| 48353      | GPD00 | 42 <sup>c</sup> | 36            | 19.91(6.70)                                           | 0.07(0.29)  | 0.14(0.41)  | 296.78 |
| 48350      | GPD00 | 39 <sup>b</sup> | 40            | 17.53(4.38)                                           | 0.06(0.19)  | 0.08(0.91)  | 318.41 |
| 48354      | GPD00 | 43 <sup>b</sup> | 37            | 18.75(5.76)                                           | 0.32(0.26)  | 0.08(0.95)  | 319.30 |
| 48360      | GPD00 | 35 <sup>a</sup> | 18            | 61.70(0.01)                                           | -1.16(0.01) | 0.22(0.27)  | 138.60 |
| 48381      | GPD00 | 50 <sup>b</sup> | 39            | 14.34(3.60)                                           | 0.24(0.19)  | 0.11(0.70)  | 309.02 |
| 48383      | GPD00 | 52 <sup>b</sup> | 41            | 21.19(4.52)                                           | 0.08(0.14)  | 0.11(0.61)  | 343.31 |
| 48384      | GPD00 | 46 <sup>c</sup> | 38            | 20.90(5.33)                                           | 0.08(0.19)  | 0.07(0.97)  | 317.49 |
| 48382      | GPD00 | 55 <sup>b</sup> | 44            | 15.23(3.22)                                           | 0.1(0.14)   | 0.08(0.87)  | 341.30 |
| 48390      | GPD00 | 48 <sup>b</sup> | 18            | 28.06(9.58)                                           | 0.01(0.24)  | 0.12(0.93)  | 160.65 |
| 48403      | GPD00 | 51 <sup>b</sup> | 37            | 19.55(4.48)                                           | 0.11(0.16)  | 0.09(0.90)  | 306.59 |
| 48405      | GPD00 | 50 <sup>b</sup> | 40            | 28.00(5.94)                                           | -0.17(0.14) | 0.11(0.63)  | 336.69 |
| 48404      | GPD10 | 57 <sup>b</sup> | 37            | $\sigma_0 = 3.08(0.001),$<br>$\sigma_1 = -0.01(0.20)$ | 0.04(0.40)  | 0.10(0.77)  | 297.89 |
| 48408      | GPD00 | 57 <sup>b</sup> | 40            | 30.31(6.66)                                           | -0.27(0.15) | 0.08(0.93)  | 335.28 |
| 48407      | GPD00 | 54 <sup>b</sup> | 34            | 31.92(7.47)                                           | -0.38(0.17) | 0.10(0.87)  | 281.50 |
| 48409      | GPD00 | 53 <sup>b</sup> | 37            | 39.34(8.65)                                           | -0.45(0.16) | 0.12(0.63)  | 316.22 |
| 48431      | GPD00 | 48 <sup>b</sup> | 44            | 21.69(4.19)                                           | -0.12(0.12) | 0.10(0.74)  | 351.34 |
| 48435      | GPD00 | 37 <sup>b</sup> | 42            | 33.28(6.60)                                           | -0.48(0.14) | 0.11(0.64)  | 341.65 |
| 48434      | GPD00 | 80 <sup>b</sup> | 94            | 44.90(6.41)                                           | -0.02(0.09) | 0.06(0.86)  | 902.62 |

Table S 27: Parameter estimates and standard error (SE) with thresholds ( $u$ ), number of exceedances  $n_{y_i > u}$ , and goodness-of-fit test results(p-values) for the maximum cumulative rainfall of of CONS-3 days for all stations.

| Station ID | Model | $u$             | $n_{y_i > u}$ | $\sigma(SE)$                                                                        | $\xi(SE)$                                         | KS(p-value) | AIC    |
|------------|-------|-----------------|---------------|-------------------------------------------------------------------------------------|---------------------------------------------------|-------------|--------|
| 48353      | GPD00 | 35 <sup>a</sup> | 77            | 43.28(6.88)                                                                         | -0.29(6.88)                                       | 0.05(0.95)  | 692.25 |
| 48350      | GPD00 | 67 <sup>b</sup> | 22            | 39.80(11.13)                                                                        | -0.81(11.13)                                      | 0.13(0.77)  | 174.02 |
| 48354      | GPD20 | 68 <sup>b</sup> | 21            | $\sigma_0 = 7.60(0.002),$<br>$\sigma_1 = -0.06(0.002),$<br>$\sigma_2 = 0.002(0.20)$ | -1.02(0.001)                                      | 0.10(0.96)  | 177.75 |
| 48360      | GPD00 | 35 <sup>a</sup> | 25            | 39.32(10.05)                                                                        | -0.61(10.05)                                      | 0.14(0.60)  | 206.84 |
| 48381      | GPD00 | 75 <sup>b</sup> | 20            | 14.22(6.88)                                                                         | 0.81(6.88)                                        | 0.10(0.95)  | 182.65 |
| 48383      | GPD01 | 92 <sup>b</sup> | 20            | 73.70(0.01)                                                                         | $\xi_0 = 4.16(0.02),$<br>$\xi_1 = -0.03(0.001),$  | 0.15(0.70)  | 184.08 |
| 48384      | GPD00 | 35 <sup>a</sup> | 94            | 19.99(3.37)                                                                         | 0.19(3.37)                                        | 0.04(0.97)  | 791.30 |
| 48382      | GPD00 | 35 <sup>a</sup> | 93            | 29.23(4.50)                                                                         | 0.05(4.50)                                        | 0.06(0.82)  | 827.81 |
| 48390      | GPD00 | 67 <sup>c</sup> | 10            | 27.76(13.03)                                                                        | -0.1(13.03)                                       | 0.13(0.97)  | 88.33  |
| 48403      | GPD00 | 35 <sup>a</sup> | 94            | 35.18(4.87)                                                                         | -0.15(4.87)                                       | 0.05(0.94)  | 832.48 |
| 48405      | GPD00 | 35 <sup>a</sup> | 86            | 35.24(5.09)                                                                         | -0.05(5.09)                                       | 0.04(0.99)  | 778.63 |
| 48404      | GPD00 | 35 <sup>a</sup> | 106           | 39.29(5.28)                                                                         | -0.13(5.28)                                       | 0.04(0.98)  | 965.79 |
| 48408      | GPD00 | 72 <sup>b</sup> | 22            | 43.00(11.79)                                                                        | -0.23(11.79)                                      | 0.12(0.84)  | 202.95 |
| 48407      | GPD00 | 35 <sup>a</sup> | 101           | 38.04(5.08)                                                                         | -0.02(5.08)                                       | 0.05(0.93)  | 936.40 |
| 48409      | GPD01 | 35 <sup>a</sup> | 76            | 33.03(5.80)                                                                         | $\xi_0 = 0.11(0.14),$<br>$\xi_1 = -0.001(0.002),$ | 0.04(0.99)  | 680.32 |
| 48431      | GPD00 | 35 <sup>a</sup> | 79            | 26.59(4.49)                                                                         | 0.08(4.49)                                        | 0.06(0.85)  | 694.24 |
| 48435      | GPD00 | 50 <sup>c</sup> | 41            | 21.81(5.4)                                                                          | -0.13(5.4)                                        | 0.07(0.98)  | 327.32 |
| 48434      | GPD01 | 35 <sup>a</sup> | 63            | 28.89(5.32)                                                                         | $\xi_0 = -0.33(0.14),$<br>$\xi_1 = 0.07(0.002)$   | 0.11(0.36)  | 513.78 |

Table S 28: Parameter estimates and standard error (SE) with thresholds ( $u$ ), number of exceedances  $n_{y_i > u}$ , and goodness-of-fit test results(p-values) for the maximum cumulative rainfall of of CONS-4 days for all stations.

| Station ID | Model | $u$              | $n_{y_i > u}$ | $\sigma(SE)$                                          | $\xi(SE)$    | KS(p-value) | AIC    |
|------------|-------|------------------|---------------|-------------------------------------------------------|--------------|-------------|--------|
| 48353      | GPD00 | 90 <sup>b</sup>  | 16            | 15.59(6.32)                                           | 0.28(0.32)   | 0.11(0.97)  | 133.03 |
| 48350      | GPD00 | 35 <sup>a</sup>  | 63            | 48.24(8.64)                                           | -0.1(0.12)   | 0.05(0.98)  | 605.64 |
| 48354      | GPD00 | 35 <sup>a</sup>  | 80            | 50.83(7.50)                                           | -0.35(0.1)   | 0.07(0.82)  | 736.52 |
| 48360      | GPD00 | 95 <sup>c</sup>  | 8             | 13.72(8.74)                                           | 0.63(0.57)   | 0.15(0.97)  | 72.03  |
| 48381      | GPD00 | 35 <sup>a</sup>  | 89            | 40.09(5.75)                                           | -0.16(0.09)  | 0.08(0.56)  | 808.90 |
| 48384      | GPD00 | 35 <sup>a</sup>  | 58            | 47.98(8.87)                                           | -0.28(0.13)  | 0.07(0.89)  | 536.42 |
| 48383      | GPD00 | 101 <sup>b</sup> | 12            | 32.45(21.14)                                          | -0.42(0.59)  | 0.23(0.46)  | 101.28 |
| 48382      | GPD00 | 107 <sup>b</sup> | 12            | 37.49(14.90)                                          | -0.18(0.27)  | 0.16(0.85)  | 110.60 |
| 48390      | GPD10 | 95 <sup>c</sup>  | 10            | $\sigma_0 = 3.95(0.002),$<br>$\sigma_1 = 0.01(0.001)$ | -1.79(0.001) | 0.21(0.74)  | 47.80  |
| 48403      | GPD00 | 35 <sup>a</sup>  | 70            | 32.14(5.96)                                           | 0.08(0.14)   | 0.06(0.96)  | 641.85 |
| 48405      | GPD00 | 95 <sup>c</sup>  | 24            | 35.08(10.02)                                          | -0.27(0.2)   | 0.09(0.98)  | 209.46 |
| 48404      | GPD00 | 127 <sup>b</sup> | 12            | 51.23(25.56)                                          | 0.17(0.41)   | 0.19(0.74)  | 126.72 |
| 48408      | GPD00 | 92 <sup>c</sup>  | 20            | 32.3(13.74)                                           | 0.4(0.37)    | 0.1(0.96)   | 199.25 |
| 48407      | GPD00 | 116 <sup>b</sup> | 12            | 22.13(12.33)                                          | -0.35(0.48)  | 0.18(0.81)  | 93.91  |
| 48409      | GPD00 | 100 <sup>c</sup> | 16            | 27.11(10.07)                                          | -0.19(0.27)  | 0.14(0.82)  | 135.27 |
| 48431      | GPD00 | 35 <sup>a</sup>  | 57            | 47.97(8.93)                                           | -0.09(0.13)  | 0.07(0.89)  | 548.06 |
| 48435      | GPD00 | 82 <sup>c</sup>  | 19            | 25.18(9.51)                                           | -0.02(0.3)   | 0.11(0.93)  | 163.59 |
| 48434      | GPD00 | 35 <sup>a</sup>  | 57            | 33.76(6.31)                                           | -0.08(0.13)  | 0.10(0.50)  | 509.28 |

Table S 29: Parameter estimates and standard error (SE) with thresholds ( $u$ ), number of exceedances  $n_{y_i > u}$ , and goodness-of-fit test results(p-values) for the maximum cumulative rainfall of of CONS-5 days for all stations.

| Station ID | Model | $u$              | $n_{y_i > u}$ | $\sigma(SE)$  | $\xi(SE)$                                        | KS(p-value) | AIC    |
|------------|-------|------------------|---------------|---------------|--------------------------------------------------|-------------|--------|
| 48353      | GPD00 | 35 <sup>a</sup>  | 57            | 39.00(6.95)   | -0.02(0.11)                                      | 0.10(0.54)  | 532.47 |
| 48350      | GPD00 | 35 <sup>a</sup>  | 60            | 46.96(8.66)   | -0.21(0.13)                                      | 0.05(0.99)  | 560.02 |
| 48354      | GPD00 | 102 <sup>c</sup> | 11            | 39.49(17.9)   | -0.34(0.35)                                      | 0.13(0.96)  | 99.27  |
| 48360      | GPD01 | 35 <sup>a</sup>  | 12            | 3.99(0.002)   | $\xi_0 = 4.16(0.02),$<br>$\xi_1 = -1.19(0.001),$ | 0.17(0.78)  | 113.29 |
| 48381      | GPD00 | 110 <sup>c</sup> | 11            | 38.80(20.24)  | -0.06(0.42)                                      | 0.13(0.98)  | 105.08 |
| 48384      | GPD00 | 35 <sup>a</sup>  | 71            | 55.52(9.46)   | -0.21(0.12)                                      | 0.08(0.66)  | 685.31 |
| 48383      | GPD00 | 35 <sup>a</sup>  | 65            | 70.91(10.16)  | -0.49(0.09)                                      | 0.07(0.86)  | 623.46 |
| 48382      | GPD01 | 35 <sup>a</sup>  | 56            | 5.01(0.32)    | $\xi_0 = -0.02(0.01),$<br>$\xi_1 = -0.64(0.26),$ | 0.05(0.99)  | 565.43 |
| 48390      | GPD00 | 35 <sup>a</sup>  | 25            | 81.17(21.86)  | -0.32(0.19)                                      | 0.09(0.97)  | 257.82 |
| 48403      | GPD00 | 90 <sup>c</sup>  | 11            | 34.17(16.13)  | 0.001(0.36)                                      | 0.16(0.87)  | 103.59 |
| 48405      | GPD00 | 95 <sup>c</sup>  | 7             | 54.05(15.59)  | -0.52(0.57)                                      | 0.17(0.96)  | 66.52  |
| 48404      | GPD00 | 100 <sup>c</sup> | 13            | 43.30(19.36)  | -0.12(0.35)                                      | 0.11(0.98)  | 124.77 |
| 48408      | GPD00 | 105 <sup>c</sup> | 18            | 36.08(12.42)  | -0.26(0.25)                                      | 0.11(0.95)  | 159.47 |
| 48407      | GPD00 | 110 <sup>c</sup> | 12            | 20.21(10.28)  | 0.38(0.43)                                       | 0.12(0.97)  | 109.47 |
| 48409      | GPD00 | 117 <sup>b</sup> | 8             | 109.16(17.68) | -0.21(0.72)                                      | 0.17(0.93)  | 91.63  |
| 48431      | GPD00 | 104 <sup>b</sup> | 8             | 27.80(20.10)  | 0.42(0.64)                                       | 0.16(0.95)  | 79.97  |
| 48435      | GPD00 | 35 <sup>a</sup>  | 54            | 44.22(9.85)   | 0.01(0.17)                                       | 0.08(0.85)  | 522.47 |
| 48434      | GPD00 | 35 <sup>a</sup>  | 50            | 49.18(10.00)  | -0.2(0.14)                                       | 0.06(0.97)  | 473.02 |

Table S 30: Parameter estimates and standard error (SE) with thresholds ( $u$ ), number of exceedances  $n_{y_i > u}$ , and goodness-of-fit test results(p-values) for the maximum cumulative rainfall of of CONS-6 days for all stations.

| Station ID | Model | $u$                 | $n_{y_i > u}$ | $\sigma(SE)$                                          | $\xi(SE)$    | KS(p-value) | AIC    |
|------------|-------|---------------------|---------------|-------------------------------------------------------|--------------|-------------|--------|
| 48353      | GPD00 | 139 <sup>b</sup> .6 | 7             | 20.8(12.75)                                           | 0.47(0.51)   | 0.20(0.86)  | 67.08  |
| 48350      | GPD00 | 124 <sup>b</sup> .6 | 8             | 16.48(13.54)                                          | 1.01(0.82)   | 0.16(0.96)  | 81.08  |
| 48354      | GPD00 | 35 <sup>a</sup>     | 59            | 65.75(11.04)                                          | -0.19(0.1)   | 0.06(0.97)  | 592.75 |
| 48360      | GPD00 | 97.9 <sup>b</sup>   | 3             | 15.93(26.14)                                          | 0.03(1.53)   | 0.33(0.77)  | 26.81  |
| 48381      | GPD00 | 35 <sup>a</sup>     | 43            | 87.74(17.32)                                          | -0.68(0.16)  | 0.1(0.71)   | 415.81 |
| 48384      | GPD00 | 35 <sup>a</sup>     | 37            | 57.95(13.61)                                          | -0.006(0.16) | 0.1(0.82)   | 377.92 |
| 48383      | GPD00 | 120                 | 10            | 29.17(16.42)                                          | 0.05(0.46)   | 0.15(0.94)  | 92.59  |
| 48382      | GPD00 | 35 <sup>a</sup>     | 44            | 69.29(13.95)                                          | -0.3(0.14)   | 0.07(0.98)  | 437.80 |
| 48390      | GPD00 | 35 <sup>a</sup>     | 24            | 93.26(13.07)                                          | -0.09(0.29)  | 0.11(0.92)  | 265.07 |
| 48403      | GPD10 | 100 <sup>c</sup>    | 11            | $\sigma_0 = 3.89(0.001),$<br>$\sigma_1 = 0.002(0.01)$ | -1.12(0.001) | 0.15(0.96)  | 83.75  |
| 48405      | GPD00 | 35 <sup>a</sup>     | 53            | 76.61(14.79)                                          | -0.43(0.14)  | 0.09(0.75)  | 523.92 |
| 48404      | GPD00 | 110 <sup>c</sup>    | 8             | 43.04(24.24)                                          | -0.55(0.48)  | 0.19(0.88)  | 71.33  |
| 48408      | GPD00 | 125 <sup>c</sup>    | 15            | 24.51(12.41)                                          | 0.34(0.44)   | 0.12(0.97)  | 140.26 |
| 48407      | GPD00 | 35 <sup>a</sup>     | 48            | 112.83(25.16)                                         | -0.49(0.18)  | 0.11(0.5)   | 506.56 |
| 48409      | GPD00 | 35 <sup>a</sup>     | 51            | 111.47(19.16)                                         | -0.47(0.11)  | 0.09(0.77)  | 538.52 |
| 48431      | GPD00 | 35 <sup>a</sup>     | 34            | 51.35(16.47)                                          | -0.07(0.27)  | 0.15(0.35)  | 334.52 |
| 48435      | GPD00 | 95 <sup>c</sup>     | 9             | 26.23(15.8)                                           | 0.2(0.5)     | 0.15(0.95)  | 84.47  |
| 48434      | GPD00 | 110 <sup>c</sup>    | 8             | 100.5(0.01)                                           | -2.53(0.01)  | 0.28(0.54)  | 16.15  |

Table S 31: Parameter estimates and standard error (SE) with thresholds ( $u$ ), number of exceedances  $n_{y_i > u}$ , and goodness-of-fit test results(p-values) for the maximum cumulative rainfall of of CONS-7 days for all stations.

| Station ID | Model | $u$              | $n_{y_i > u}$ | $\sigma(SE)$  | $\xi(SE)$   | KS(p-value) | AIC    |
|------------|-------|------------------|---------------|---------------|-------------|-------------|--------|
| 48353      | GPD00 | 35 <sup>a</sup>  | 35            | 66.39(15.04)  | -0.26(0.15) | 0.07(0.98)  | 348.99 |
| 48350      | GPD00 | 35 <sup>a</sup>  | 32            | 68.46(16.67)  | -0.57(0.19) | 0.09(0.87)  | 301.83 |
| 48354      | GPD00 | 35 <sup>a</sup>  | 43            | 56.01(13.02)  | 0.12(0.17)  | 0.05(0.99)  | 446.78 |
| 48360      | GPD00 | 35 <sup>a</sup>  | 8             | 173.71(0.05)  | -1.21(0.01) | 0.20(0.82)  | 71.30  |
| 48381      | GPD00 | 35 <sup>a</sup>  | 21            | 77.06(23.57)  | -0.27(0.22) | 0.09(0.98)  | 216.92 |
| 48384      | GPD00 | 35 <sup>a</sup>  | 20            | 190.763(0.05) | -1.15(0.01) | 0.29(0.80)  | 200.17 |
| 48383      | GPD00 | 120 <sup>c</sup> | 14            | 42.03(15.54)  | -0.15(0.25) | 0.15(0.91)  | 132.23 |
| 48382      | GPD00 | 125 <sup>c</sup> | 8             | 39.01(21.66)  | -0.06(0.42) | 0.19(0.86)  | 77.58  |
| 48390      | GPD00 | 35 <sup>a</sup>  | 14            | 101.36(0.05)  | -1.13(0.01) | 0.15(0.88)  | 121.98 |
| 48403      | GPD00 | 100 <sup>c</sup> | 8             | 99.93(15.77)  | -0.48(0.46) | 0.20(0.82)  | 85.84  |
| 48405      | GPD00 | 115 <sup>c</sup> | 11            | 39.16(17.82)  | 0.04(0.34)  | 0.14(0.95)  | 107.59 |
| 48404      | GPD00 | 35 <sup>a</sup>  | 26            | 115.46(15.08) | -0.68(0.26) | 0.16(0.46)  | 267.45 |
| 48408      | GPD00 | 125 <sup>c</sup> | 10            | 43.26(19.15)  | 0.1(0.31)   | 0.23(0.57)  | 101.43 |
| 48407      | GPD00 | 140 <sup>c</sup> | 8             | 57.25(14.81)  | -0.37(0.51) | 0.18(0.90)  | 78.69  |
| 48409      | GPD00 | 176 <sup>b</sup> | 5             | 63.45(13.95)  | 0.23(0.73)  | 0.18(0.98)  | 57.83  |
| 48431      | GPD00 | 35 <sup>a</sup>  | 24            | 93.87(37.56)  | -0.49(0.35) | 0.19(0.33)  | 246.44 |
| 48435      | GPD00 | 35 <sup>a</sup>  | 29            | 82.64(19.47)  | -0.61(0.18) | 0.08(0.98)  | 282.64 |
| 48434      | GPD00 | 35 <sup>a</sup>  | 30            | 95.19(21.7)   | -0.62(0.17) | 0.11(0.81)  | 299.66 |

Table S 32: Estimated return level in different years of the maximum cumulative rainfall of of CONS-4 days.

| Station | 2-year | 5-year | 25-year | 50-year | 100-year |
|---------|--------|--------|---------|---------|----------|
| 48353   | 221.96 | 277.79 | 419.26  | 503.30  | 605.73   |
| 48350   | 246.73 | 270.14 | 306.32  | 320.18  | 333.09   |
| 48354   | 162.75 | 167.51 | 172.93  | 174.47  | 175.68   |
| 48360   | 279.68 | 346.75 | 493.89  | 571.13  | 658.29   |
| 48381   | 186.93 | 199.10 | 216.40  | 222.51  | 227.94   |
| 48384   | 173.55 | 180.86 | 189.92  | 192.72  | 195.03   |
| 48383   | 165.47 | 169.34 | 173.35  | 174.39  | 175.17   |
| 48382   | 217.91 | 232.38 | 252.61  | 259.65  | 265.85   |
| 48390   | 157.06 | 157.15 | 157.19  | 157.20  | 157.20   |
| 48403   | 286.93 | 338.25 | 438.78  | 486.56  | 537.28   |
| 48405   | 188.60 | 195.97 | 205.14  | 207.99  | 210.34   |
| 48404   | 457.91 | 567.03 | 807.18  | 933.60  | 1076.49  |
| 48408   | 600.97 | 866.48 | 1655.03 | 2189.49 | 2897.85  |
| 48407   | 165.48 | 169.28 | 173.60  | 174.83  | 175.80   |
| 48409   | 182.08 | 191.17 | 203.65  | 207.91  | 211.63   |
| 48431   | 248.05 | 271.69 | 308.38  | 322.48  | 335.65   |
| 48435   | 189.33 | 209.56 | 243.94  | 258.31  | 272.41   |
| 48434   | 189.66 | 207.50 | 235.58  | 246.51  | 256.80   |

Table S 33: Estimated return level in different years of the maximum cumulative rainfall of of CONS-5 days.

| Station | 2-year | 5-year | 25-year | 50-year | 100-year |
|---------|--------|--------|---------|---------|----------|
| 48353   | 254.66 | 284.40 | 334.84  | 355.88  | 376.51   |
| 48350   | 195.84 | 205.99 | 219.61  | 224.17  | 228.09   |
| 48354   | 191.89 | 198.51 | 206.08  | 208.25  | 209.96   |
| 48360   | 157.43 | 161.72 | 166.50  | 167.83  | 168.87   |
| 48381   | 262.41 | 288.23 | 330.06  | 346.79  | 362.78   |
| 48384   | 225.65 | 237.08 | 252.35  | 257.44  | 261.81   |
| 48383   | 171.59 | 173.87 | 176.06  | 176.58  | 176.94   |
| 48382   | 255.54 | 265.96 | 279.05  | 283.15  | 286.55   |
| 48390   | 254.64 | 263.25 | 273.43  | 276.43  | 278.84   |
| 48403   | 250.32 | 280.89 | 334.27  | 357.14  | 379.94   |
| 48405   | 188.17 | 191.96 | 195.47  | 196.27  | 196.83   |
| 48404   | 258.58 | 279.19 | 310.20  | 321.78  | 332.40   |
| 48408   | 203.96 | 211.79 | 221.65  | 224.76  | 227.33   |
| 48407   | 390.25 | 532.23 | 943.91  | 1217.51 | 1575.59  |
| 48409   | 423.06 | 459.06 | 507.39  | 523.56  | 537.49   |
| 48431   | 442.52 | 634.01 | 1215.69 | 1617.23 | 2155.74  |
| 48435   | 316.36 | 359.89 | 437.41  | 471.22  | 505.27   |
| 48434   | 204.38 | 216.40 | 232.73  | 238.26  | 243.05   |



Table S 34: Estimated return level in different years of the maximum cumulative rainfall of CONS-6 days.

| Station | 2-year | 5-year | 25-year | 50-year | 100-year |
|---------|--------|--------|---------|---------|----------|
| 48353   | 320.54 | 349.44 | 393.99  | 411.00  | 426.83   |
| 48350   | 364.71 | 415.74 | 507.83  | 548.47  | 589.72   |
| 48354   | 274.69 | 290.35 | 311.88  | 319.25  | 325.68   |
| 48360   | 150.85 | 154.45 | 158.43  | 159.53  | 160.38   |
| 48381   | 161.38 | 162.10 | 162.65  | 162.76  | 162.82   |
| 48384   | 395.47 | 446.19 | 534.51  | 572.25  | 609.82   |
| 48383   | 241.33 | 251.48 | 264.49  | 268.64  | 272.13   |
| 48382   | 229.60 | 236.90 | 245.65  | 248.26  | 250.38   |
| 48390   | 479.04 | 523.32 | 592.24  | 618.78  | 643.61   |
| 48403   | 152.04 | 152.15 | 152.19  | 152.20  | 152.20   |
| 48405   | 201.09 | 204.54 | 208.09  | 209.00  | 209.68   |
| 48404   | 184.08 | 186.89 | 189.68  | 190.37  | 190.87   |
| 48408   | 495.41 | 658.47 | 1103.80 | 1385.48 | 1742.68  |
| 48407   | 255.04 | 258.56 | 261.95  | 262.76  | 263.34   |
| 48409   | 259.82 | 263.61 | 267.34  | 268.25  | 268.91   |
| 48431   | 295.13 | 322.49 | 366.03  | 383.16  | 399.37   |
| 48435   | 242.90 | 262.30 | 291.74  | 302.82  | 313.04   |
| 48434   | 149.51 | 149.57 | 149.59  | 149.60  | 149.60   |

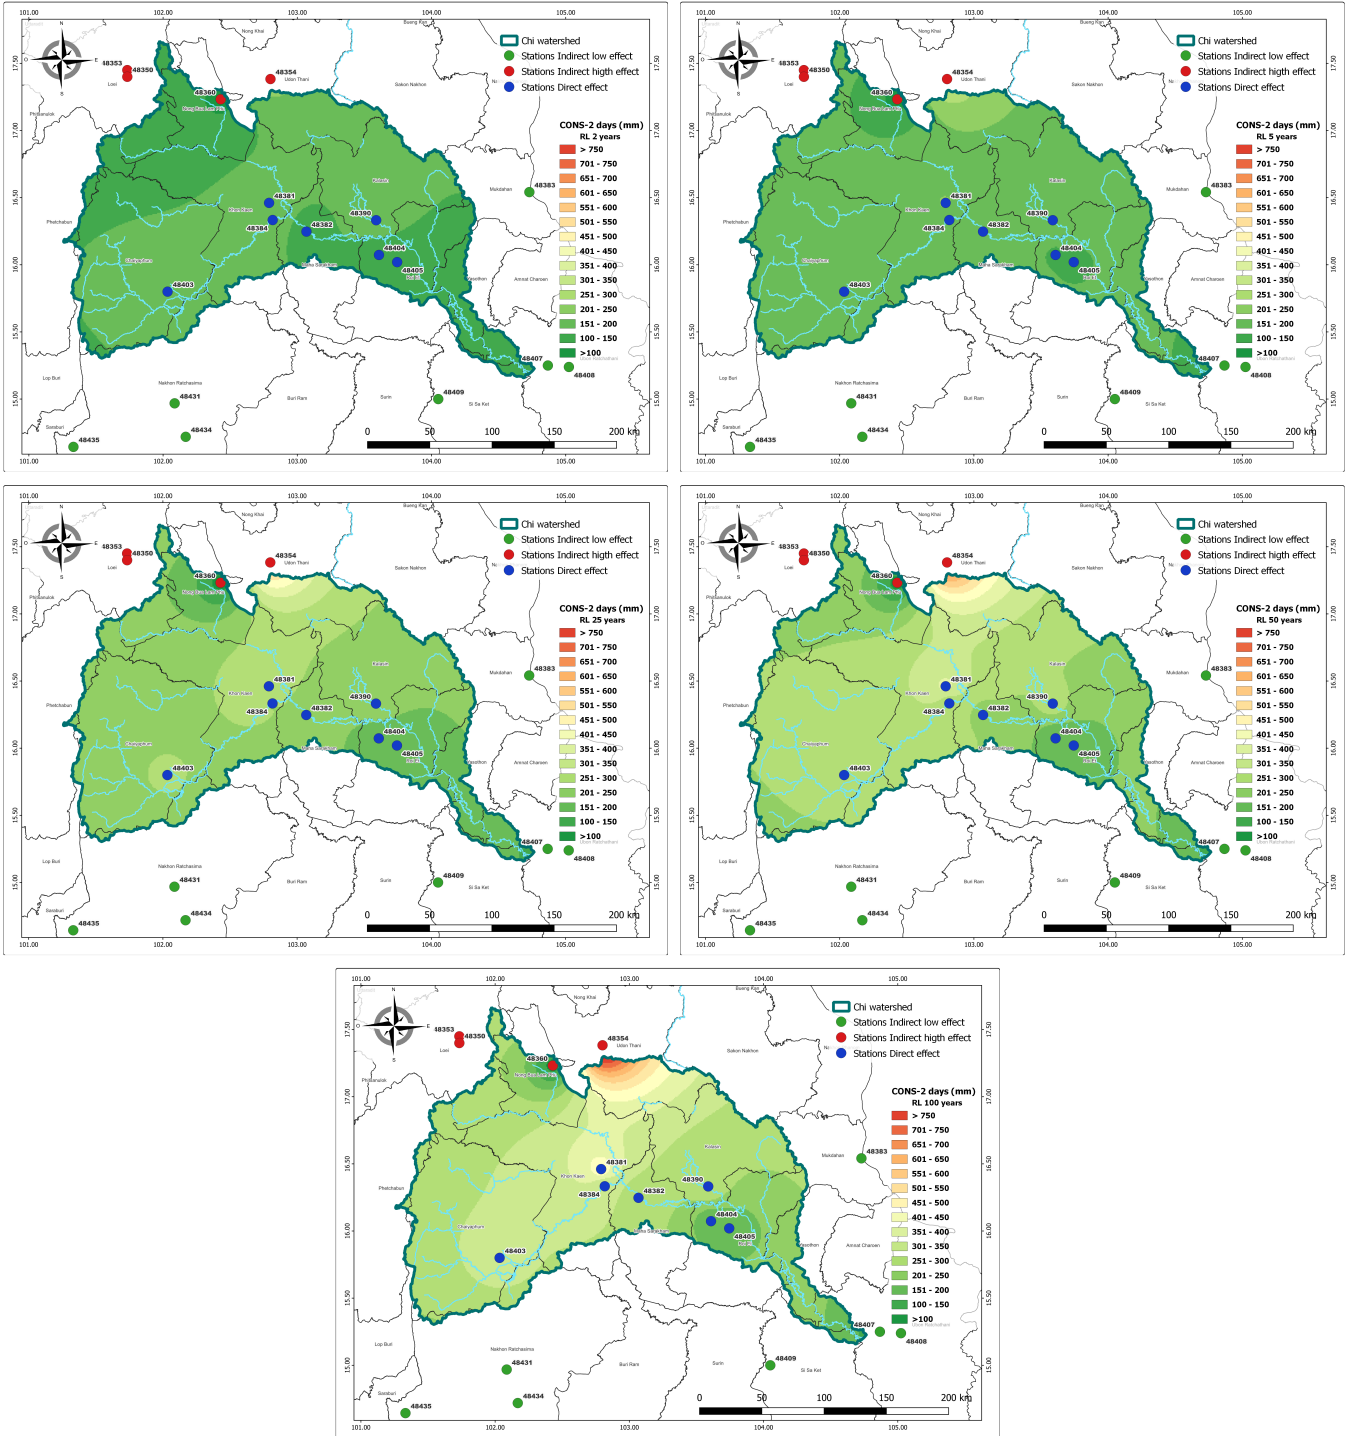

Figure S 13: The estimated return level of maximum cumulative rainfall of consecutive rainy 2-days in the Chi watershed for 2, 5, 25, 50 and 100-year periods.

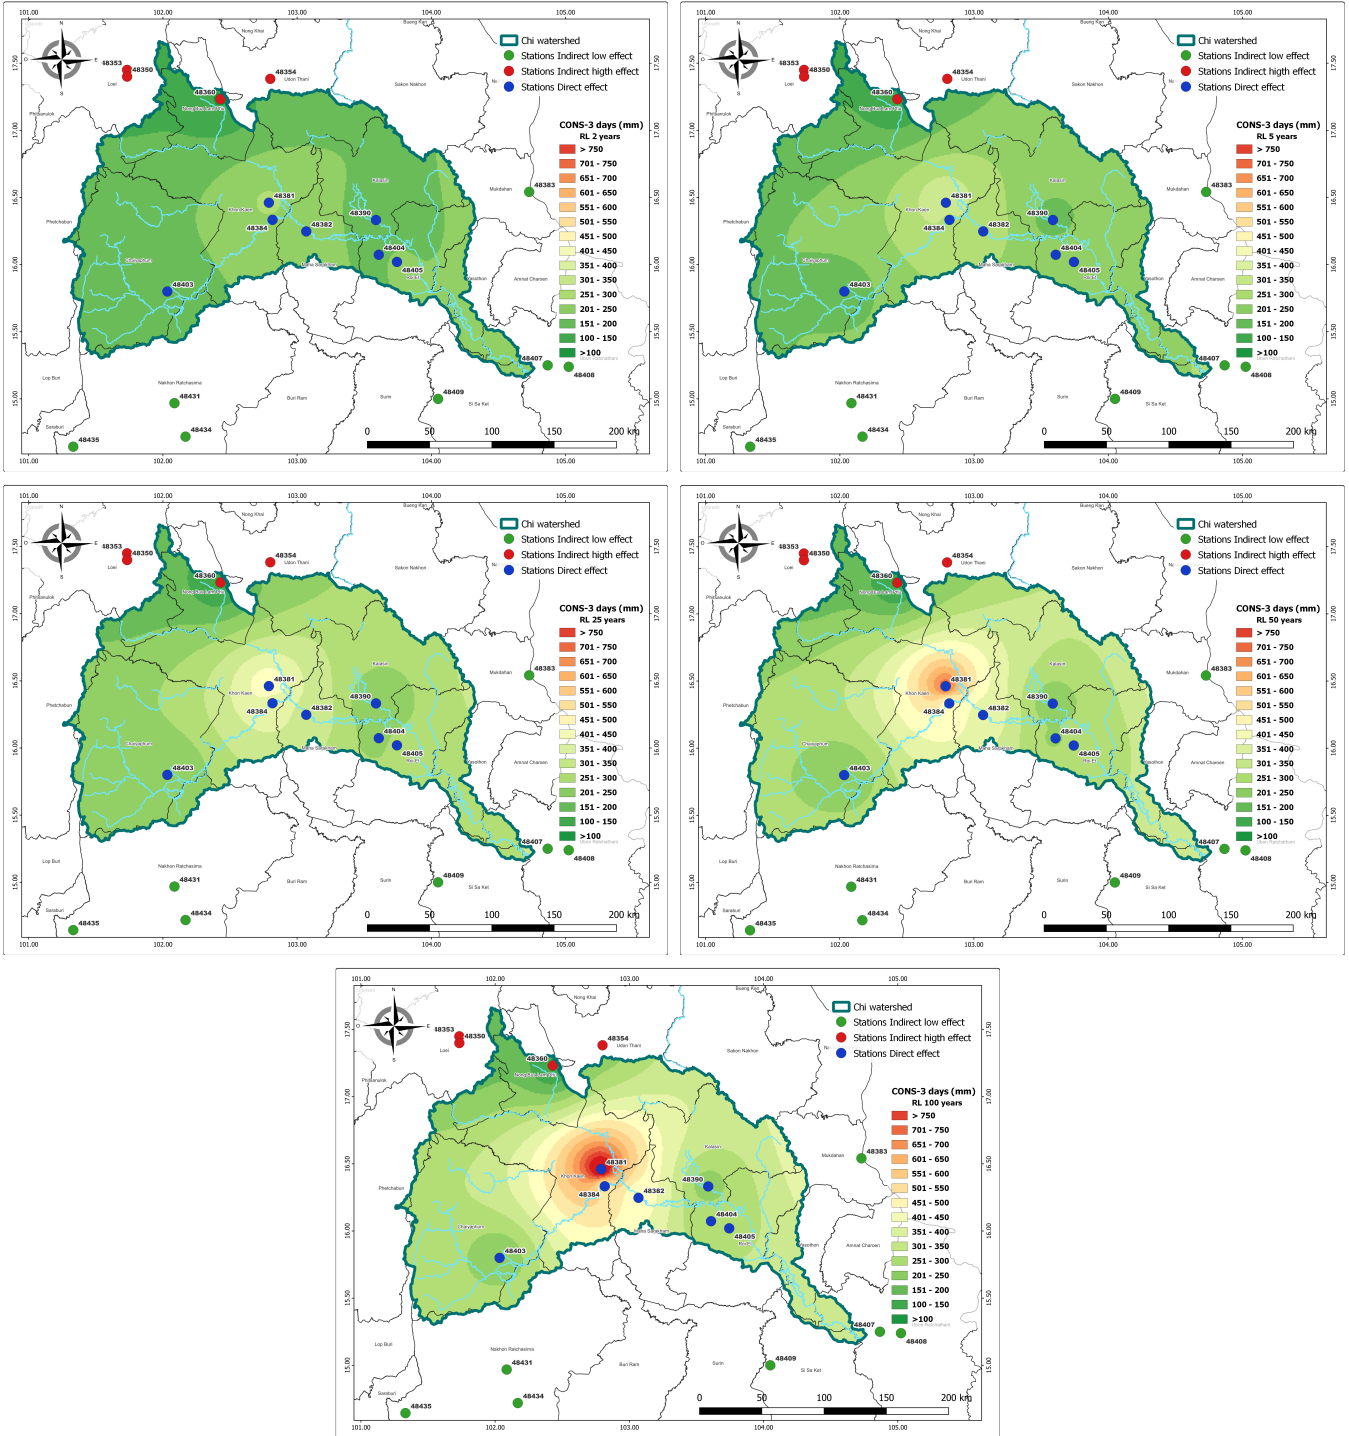

Figure S 14: The estimated return level of maximum cumulative rainfall of consecutive rainy 3-days in the Chi watershed for 2, 5, 25, 50 and 100-year periods.

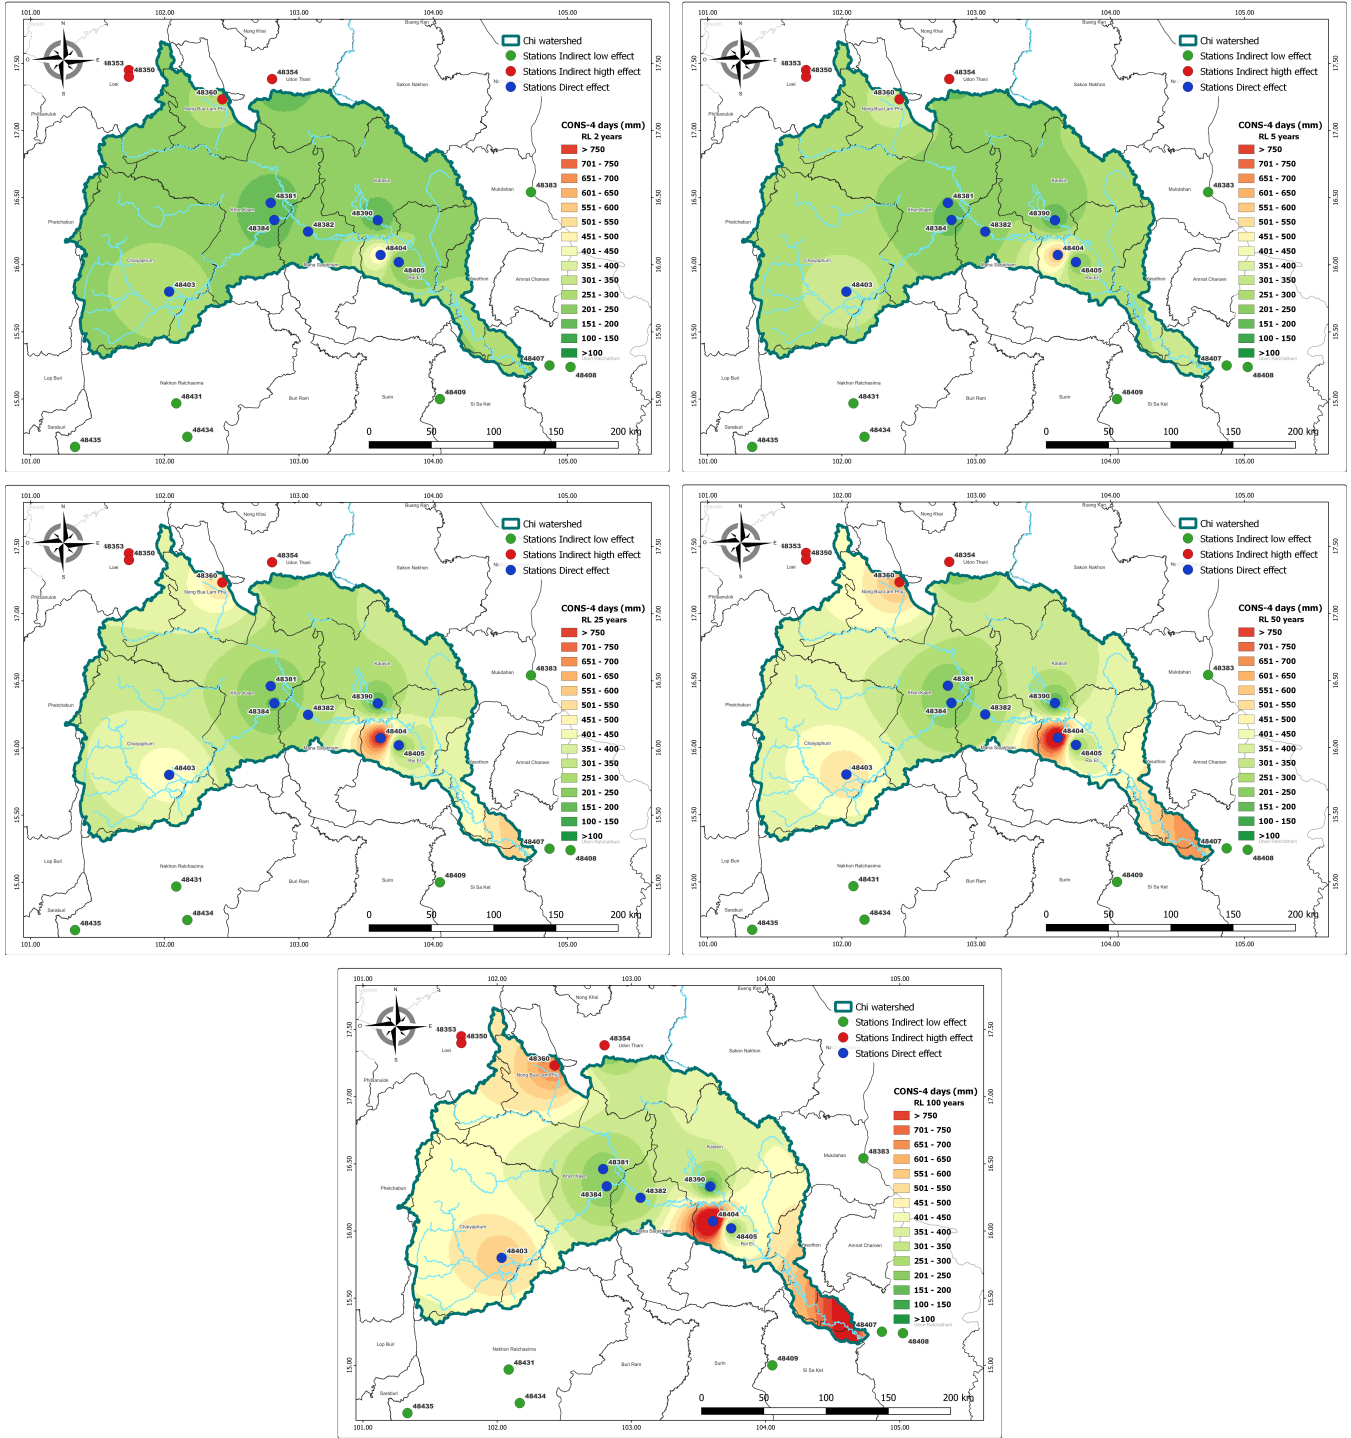

Figure S 15: The estimated return level of maximum cumulative rainfall of consecutive rainy 4-days in the Chi watershed for 2, 5, 25, 50 and 100-year periods.

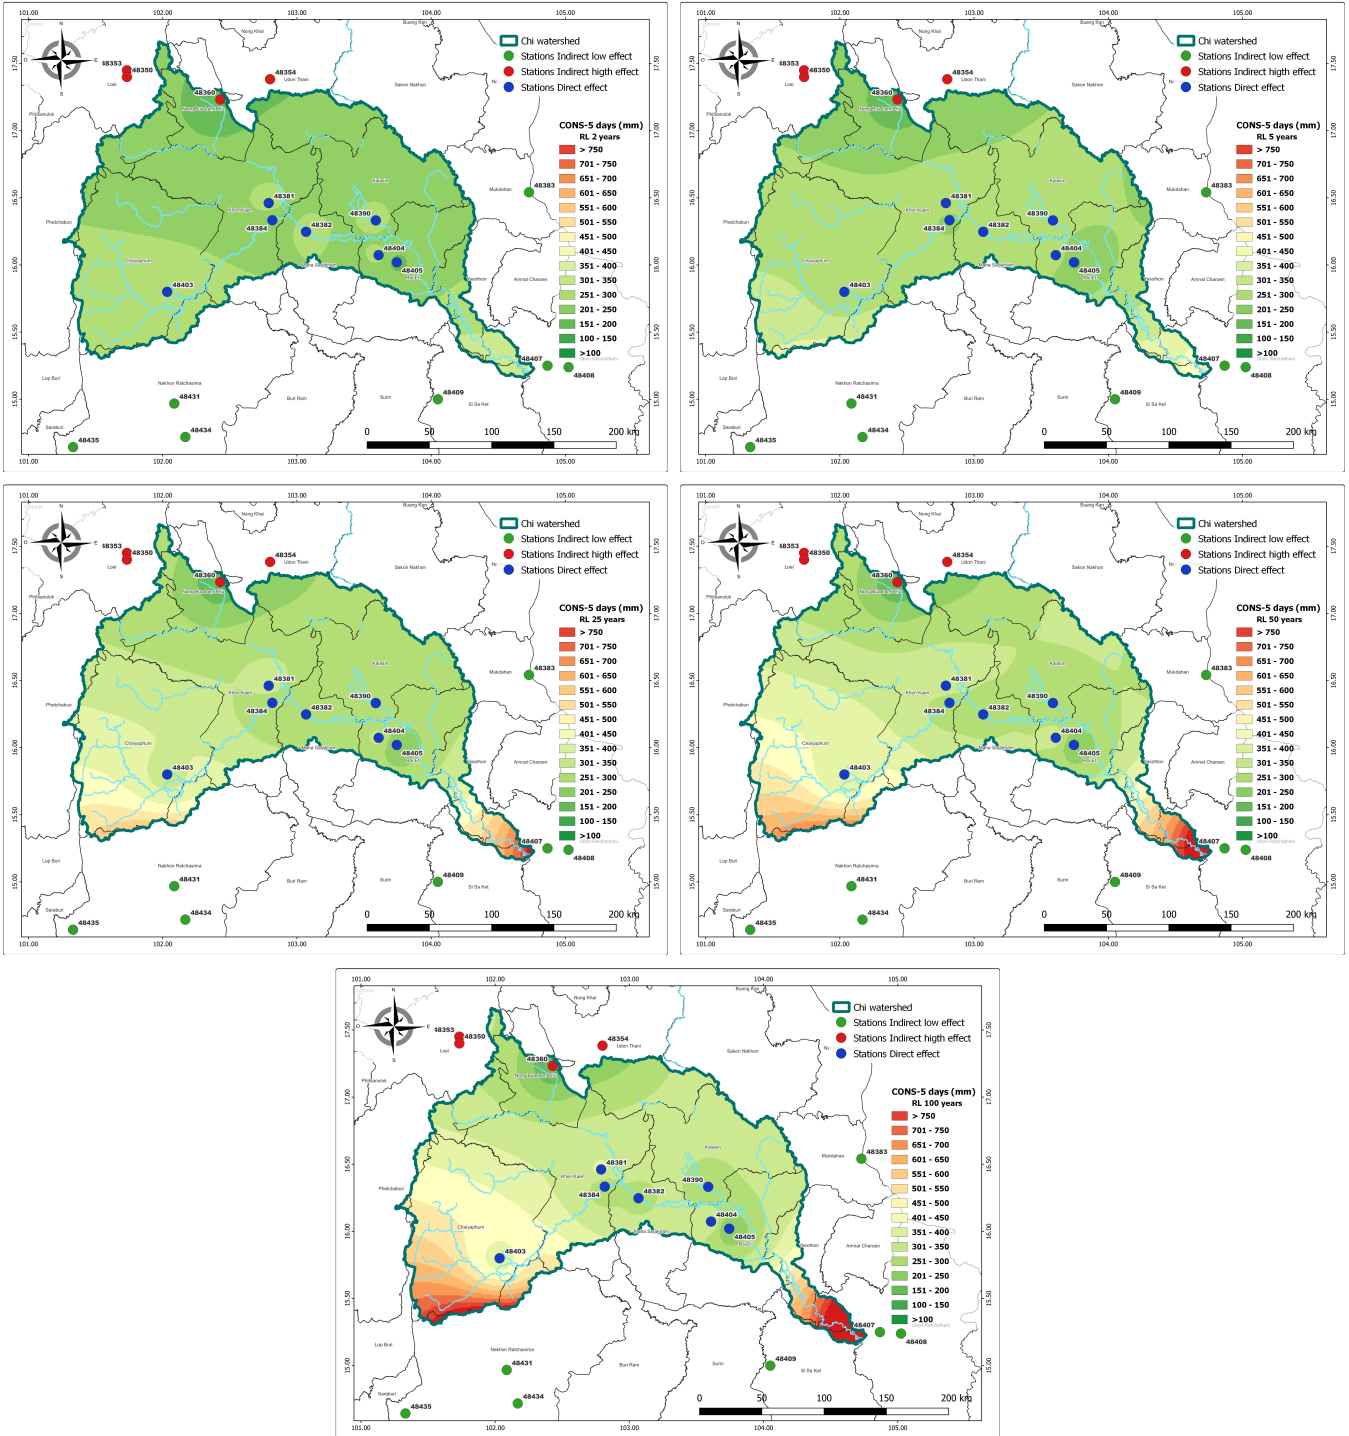

Figure S 16: The estimated return level of maximum cumulative rainfall of consecutive rainy 5-days in the Chi watershed for 2, 5, 25, 50 and 100-year periods.

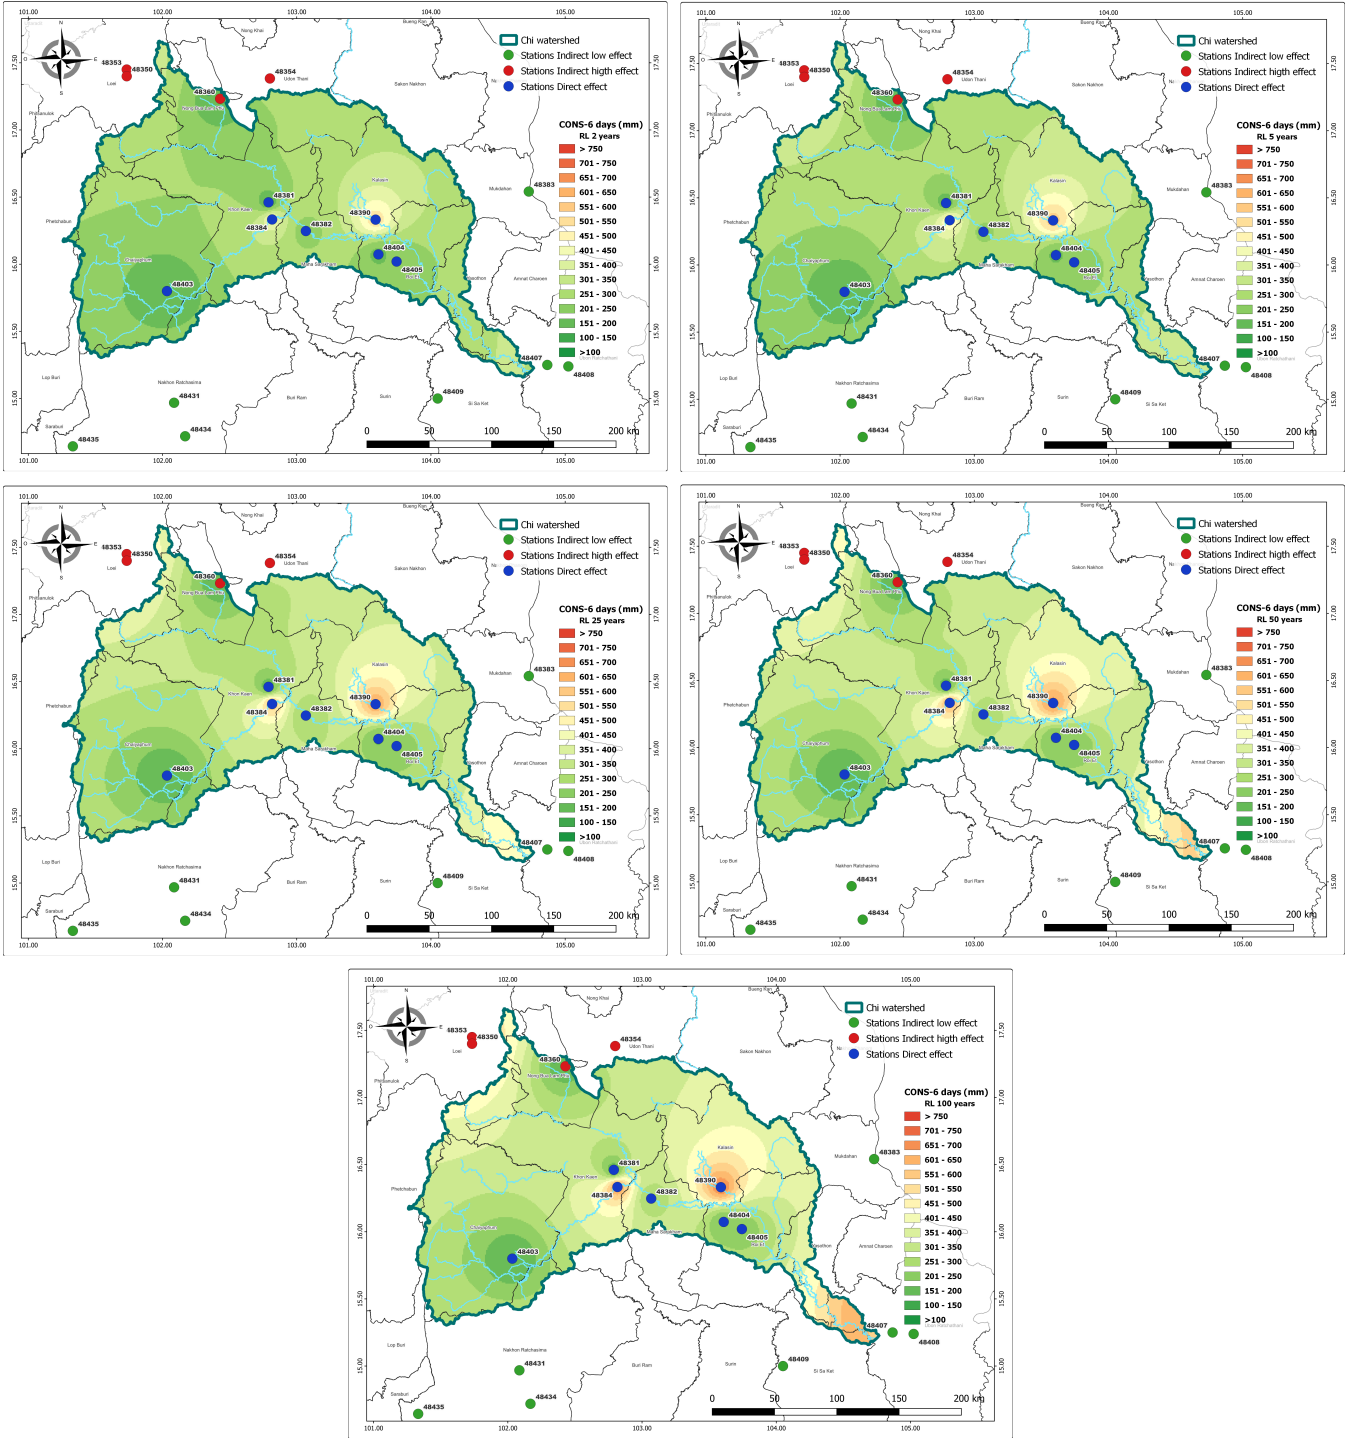

Figure S 17: The estimated return level of maximum cumulative rainfall of consecutive rainy 6-days in the Chi watershed for 2, 5, 25, 50 and 100-year periods.

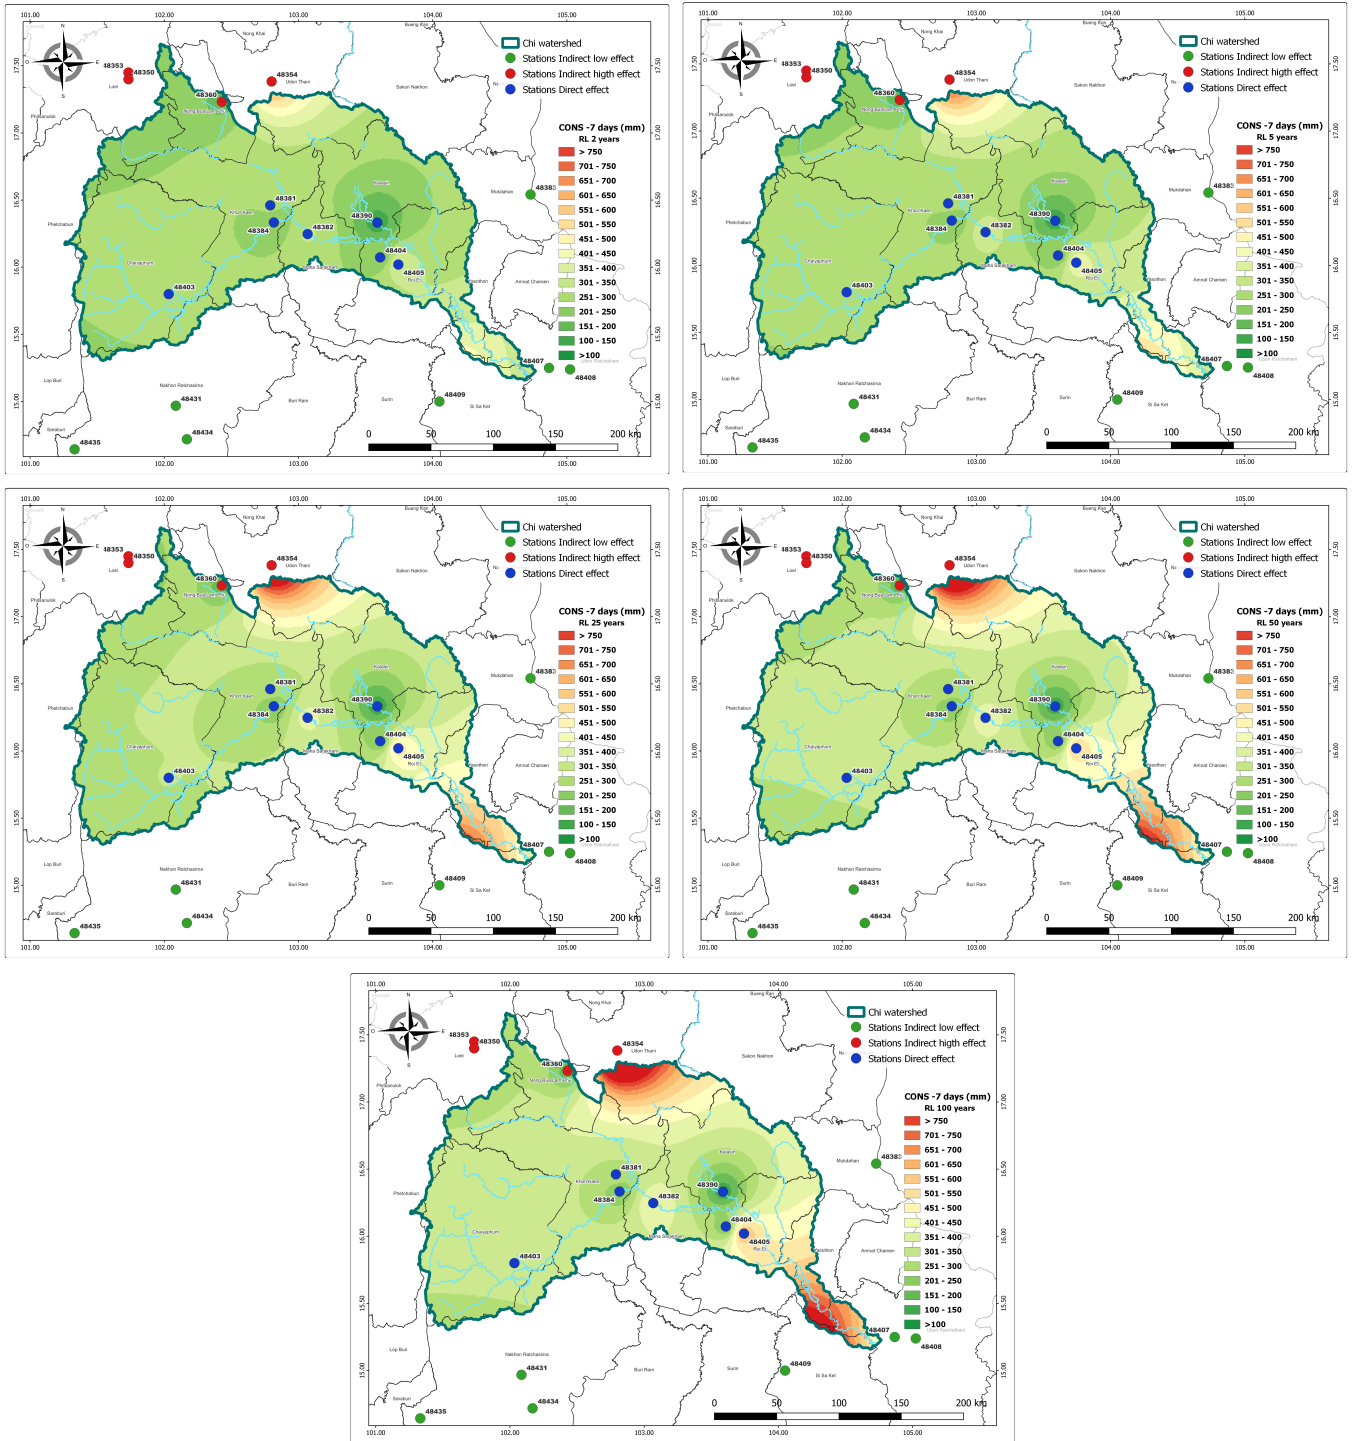

Figure S 18: The estimated return level of maximum cumulative rainfall of consecutive rainy 7-days in the Chi watershed for 2, 5, 25, 50 and 100-year periods.
